# Supplementary material for: Structure of Dunaliella photosystem II reveals conformational flexibility of stacked and unstacked supercomplexes
Source: eLife journal article supplement (doi:10.7554/elife.81150), 2023-02-17

**a** C2S2

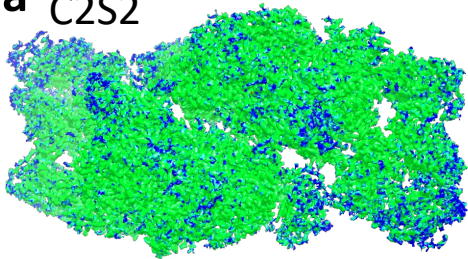

**c** C2S2 Compact

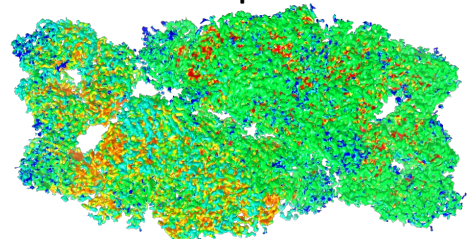

**e** C2S2 Stretched

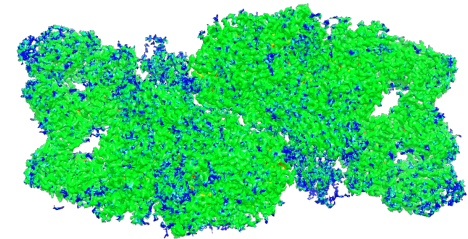

**g** C2S

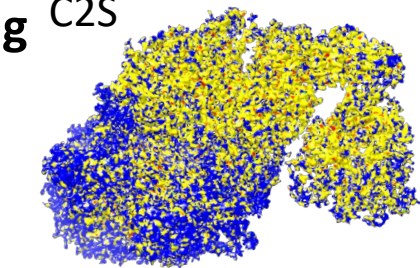

**i** Stacked Compact

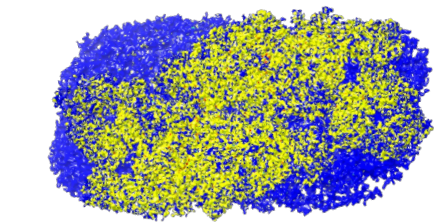

**k** Stacked Stretched

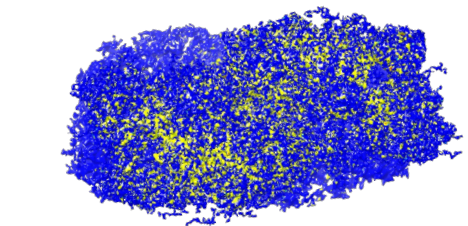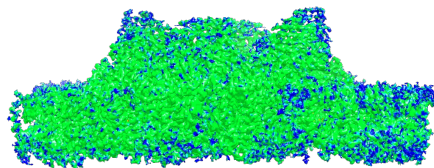

PDB 7PI0  
EMD 13429

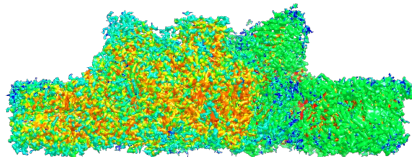

PDB 7PI5  
EMD 13430

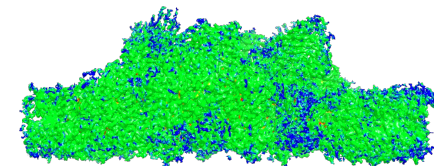

PDB 7PNK  
EMD 13548

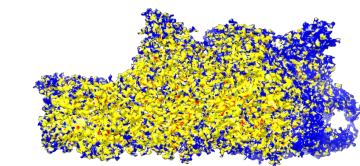

PDB 7PIN  
EMD 13444

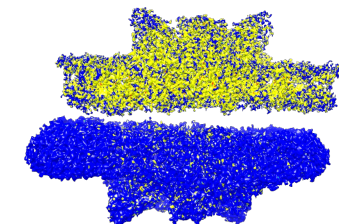

PDB 7PIW  
EMD 13445

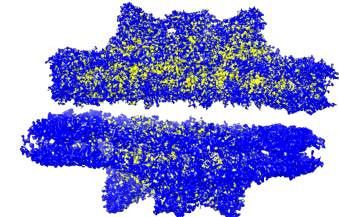

**b**

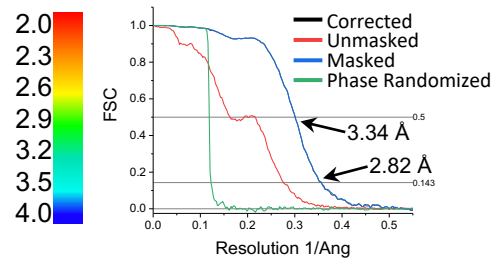

**d**

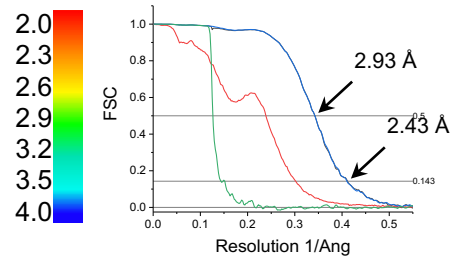

**f**

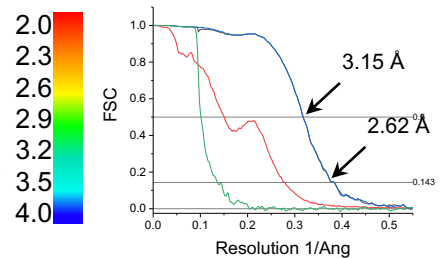

**h**

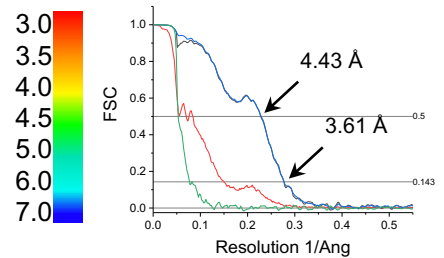

**j**

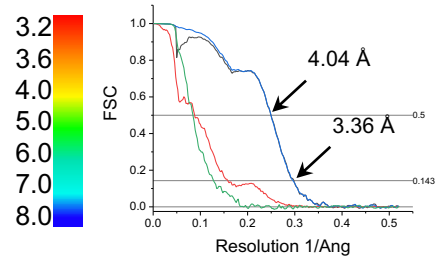

**l**

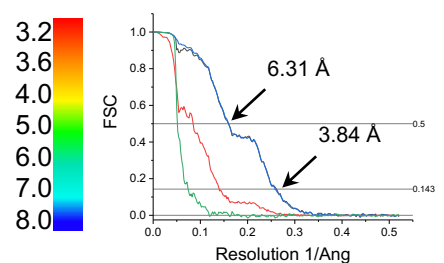

Supplement: supp [file elife-81150-supp-v1.zip]
