# Supplementary material for: Structure of Dunaliella photosystem II reveals conformational flexibility of stacked and unstacked supercomplexes
Source: eLife journal article supplement (doi:10.7554/elife.81150), 2023-02-17
Supplement: supp [file elife-81150-supp-v1.zip]

a

|                 |            |          |       |          |     |    |
|-----------------|------------|----------|-------|----------|-----|----|
| Dunaliella_sali | RANLGMEVMH | ERNAHNFR | LD    | LA       |     |    |
| Chlamydomonas_r | RANLGMEVMH | ERNAHNFR | LD    | LA       |     |    |
| Haematococcus_l | RANLGMEVMH | ERNAHNFR | LD    | LA       |     |    |
| Pisum_sativum_D | RANLGMEVMH | ERNAHNFR | LD    | LA       |     |    |
| Zea_mays_D1_NP_ | RANLGMEVMH | ERNAHNFR | LD    | LA       |     |    |
| Spinacia_olerac | RANLGMEVMH | ERNAHNFR | LD    | LA       |     |    |
| Thermosynechoco | RANLGMEVMH | ERNAHNFR | LD    | LA       |     |    |
| Prochlorococcus | RANLGMEVMH | ERNAHNFR | LD    | LA       |     |    |
| Chaetoceros_gra | RANLGI     | EV       | MH    | ERNAHNFR | LD  | LA |
| Cyanidium_calda | RANLGI     | EV       | MH    | ERNAHNFR | LD  | LA |
| Cyanidioschyzon | RANLGI     | EV       | MH    | ERNAHNFR | LD  | LA |
| Nostoc_7120_D1_ | RANLGI     | EV       | MH    | ERNAHNFR | LD  | LA |
| Synechocystis_6 | RANIGF     | EV       | MH    | ERNAHNFR | LD  | LA |
| Consistency     | ***9*      | 7*****   | ***** | ***      | *** |    |

b

|                 |        |      |          |         |     |     |        |       |
|-----------------|--------|------|----------|---------|-----|-----|--------|-------|
| Dunaliella_sali | AAEYMT | HAF  | L        | GSLNSVG | GV  | A   | TEINAV | NFV   |
| Chlamydomonas_r | AAEYMT | HAF  | L        | GSLNSVG | GV  | A   | TEINAV | NFV   |
| Haematococcus_l | AAEYMT | HAF  | L        | GSLNSVG | GV  | A   | TEINAV | NFV   |
| Thermosynechoco | AAEYMT | HAF  | L        | GSLNSVG | GV  | A   | TEIN   | SVNFV |
| Pisum_sativum_C | SAEYMT | HAF  | L        | GSLNSVG | GV  | A   | TEINAV | NYV   |
| Zea_mays_CP43_Q | SAEYMT | HAF  | L        | GSLNSVG | GV  | A   | TEINAV | NYV   |
| Spinacia_olerac | SAEYMT | HAF  | L        | GSLNSVG | GV  | A   | TEINAV | NYV   |
| Chaetoceros_gra | AAEYMT | HAF  | L        | GSLNSVG | GV  | A   | TEIN   | SVNYV |
| Cyanidioschyzon | AAEYMT | HAF  | L        | GSLNSVG | GV  | A   | TEIN   | SVNYV |
| Cyanidium_calda | AAEYMT | HAF  | L        | GSINSVG | GV  | A   | TEIN   | SFNYV |
| Nostoc_7120_CP4 | AAEYMT | HAF  | L        | GSLNSVG | GV  | A   | TEIN   | SFNYV |
| Synechocystis_6 | AAEYMT | HAF  | L        | GSLNSVG | GV  | I   | TDVNS  | SFNYV |
| Prochlorococcus | AAEYMT | HAF  | N        | ASINSVG | GV  | I   | TEPNA  | VNFV  |
| Consistency     | 8***** | ***8 | 9*9***** | 98*     | 98* | 77* | 8*     |       |

Unconserved 0 1 2 3 4 5 6 7 8 9 10 Conserved
