# Supplementary material for: Structure of Dunaliella photosystem II reveals conformational flexibility of stacked and unstacked supercomplexes
Source: eLife journal article supplement (doi:10.7554/elife.81150), 2023-02-17
Supplement: supp [file elife-81150-supp-v1.zip]

Archive with 31 entries (31 files):
- elife_poa_e81150_Video_1.mp4
- elife_poa_e81150_Video_2.mp4
- elife_poa_e81150_Video_3.mp4
- elife_poa_e81150_Video_4.mp4
- elife_poa_e81150_Video_5.mp4
- elife_poa_e81150_Video_6.mp4
- elife_poa_e81150_Video_7.mp4
- elife_poa_e81150_Video_8.mp4
- elife_poa_e81150_Video_9.mp4
- elife_poa_e81150_Video_10.mp4
- elife_poa_e81150_Figure_1_figure_supplement_9_source_data_1.pptx
- elife_poa_e81150_Figure_1_figure_supplement_9_source_data_2.xlsx
- elife_poa_e81150_Supplementary_file_1.docx
- elife_poa_e81150_Supplementary_file_2.docx
- elife_poa_e81150_Supplementary_file_3.docx
- elife_poa_e81150_Figure_1_figure_supplement_1.pdf
- elife_poa_e81150_Figure_1_figure_supplement_2.pdf
- elife_poa_e81150_Figure_1_figure_supplement_3.pdf
- elife_poa_e81150_Figure_1_figure_supplement_4.pdf
- elife_poa_e81150_Figure_1_figure_supplement_5.pdf
- elife_poa_e81150_Figure_1_figure_supplement_6.pdf
- elife_poa_e81150_Figure_1_figure_supplement_7.pdf
- elife_poa_e81150_Figure_1_figure_supplement_8.pdf
- elife_poa_e81150_Figure_1_figure_supplement_9.pdf
- elife_poa_e81150_Figure_3_figure_supplement_1.pdf
- elife_poa_e81150_Figure_3_figure_supplement_2.pdf
- elife_poa_e81150_Figure_4_figure_supplement_1.pdf
- elife_poa_e81150_Figure_4_figure_supplement_2.pdf
- elife_poa_e81150_Figure_4_figure_supplement_3.pdf
- elife_poa_e81150_Figure_4_figure_supplement_4.pdf
- elife_poa_e81150_Figure_4_figure_supplement.pdf
