# Supplementary material for: Structure of Dunaliella photosystem II reveals conformational flexibility of stacked and unstacked supercomplexes
Source: eLife journal article supplement (doi:10.7554/elife.81150), 2023-02-17
Supplement: supp [file elife-81150-supp-v1.zip › elife_poa_e81150_Figure_1_figure_supplement_9_source_data_2.xlsx]

## Sheet: Sheet1
Fraction	Oxygen evolution,
	µmol O2/hour*mg chl
As	276
Bs	816
Cs	204
