# Supplementary figures and images for: Structure of Dunaliella photosystem II reveals conformational flexibility of stacked and unstacked supercomplexes
Source: eLife journal article supplement (doi:10.7554/elife.81150), 2023-02-17

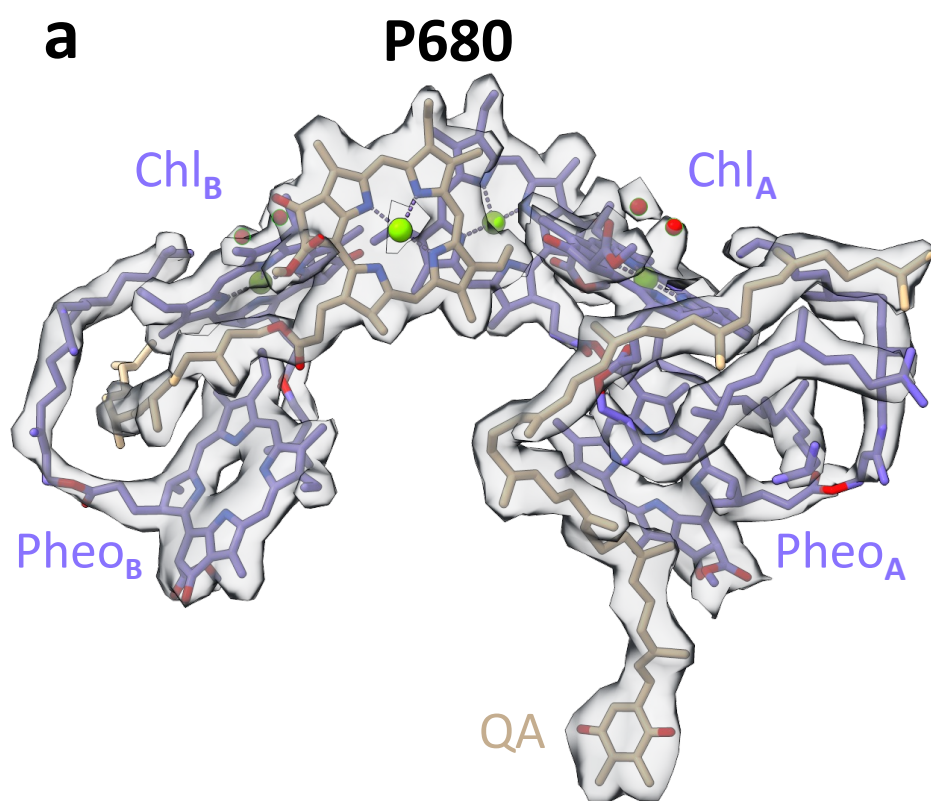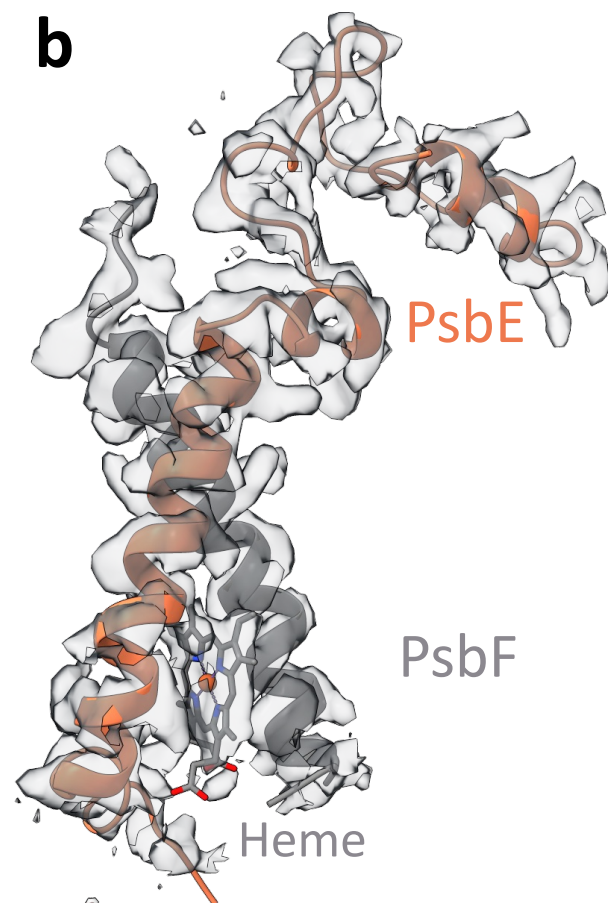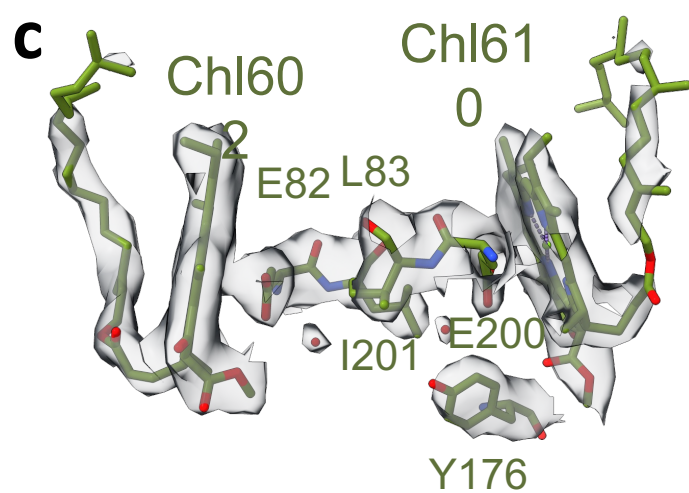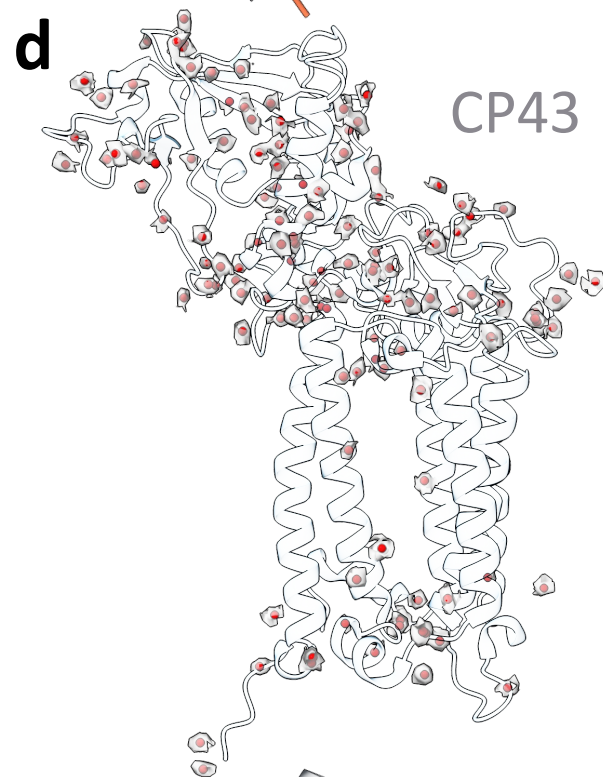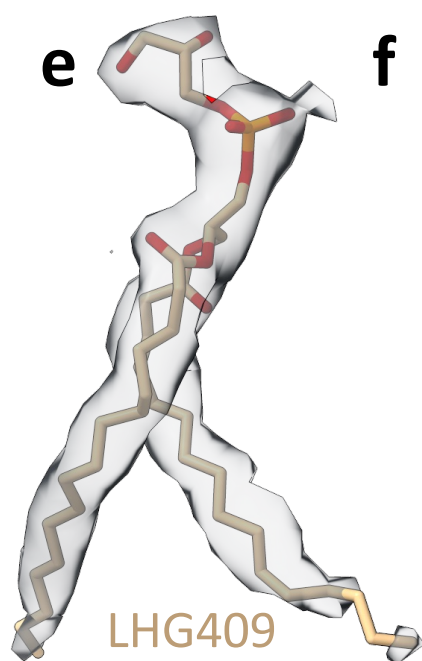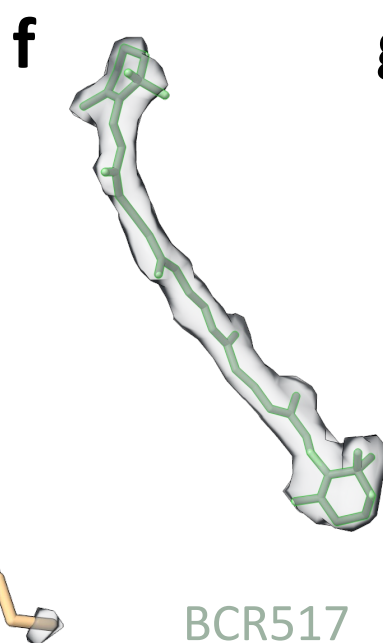

**g**

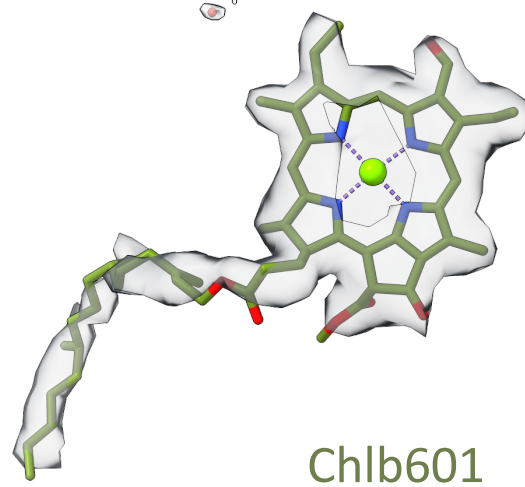

Supplement: supp [file elife-81150-supp-v1.zip]

**a**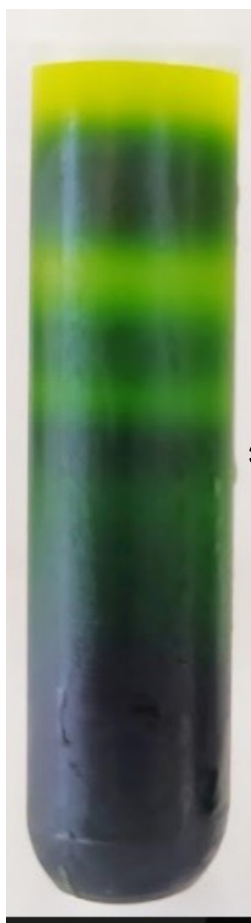**b**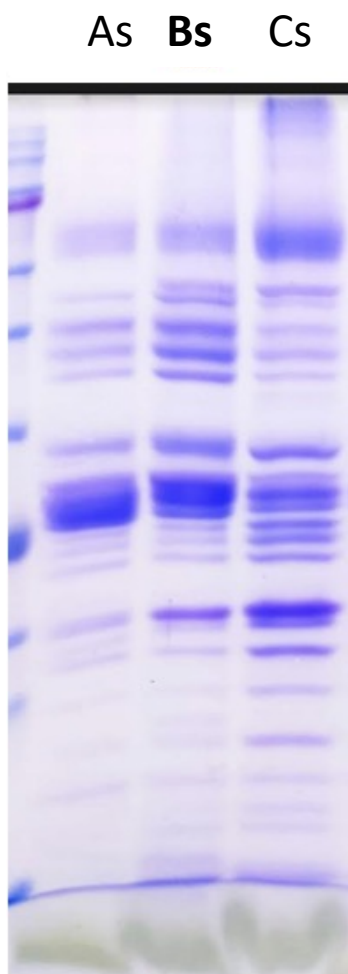**c**

| Fraction  | Oxygen evolution,<br>$\mu\text{mol O}_2/\text{hour} \cdot \text{mg chl}$ |
|-----------|--------------------------------------------------------------------------|
| As        | 276                                                                      |
| <b>Bs</b> | 816                                                                      |
| Cs        | 204                                                                      |

Supplement: supp [file elife-81150-supp-v1.zip]

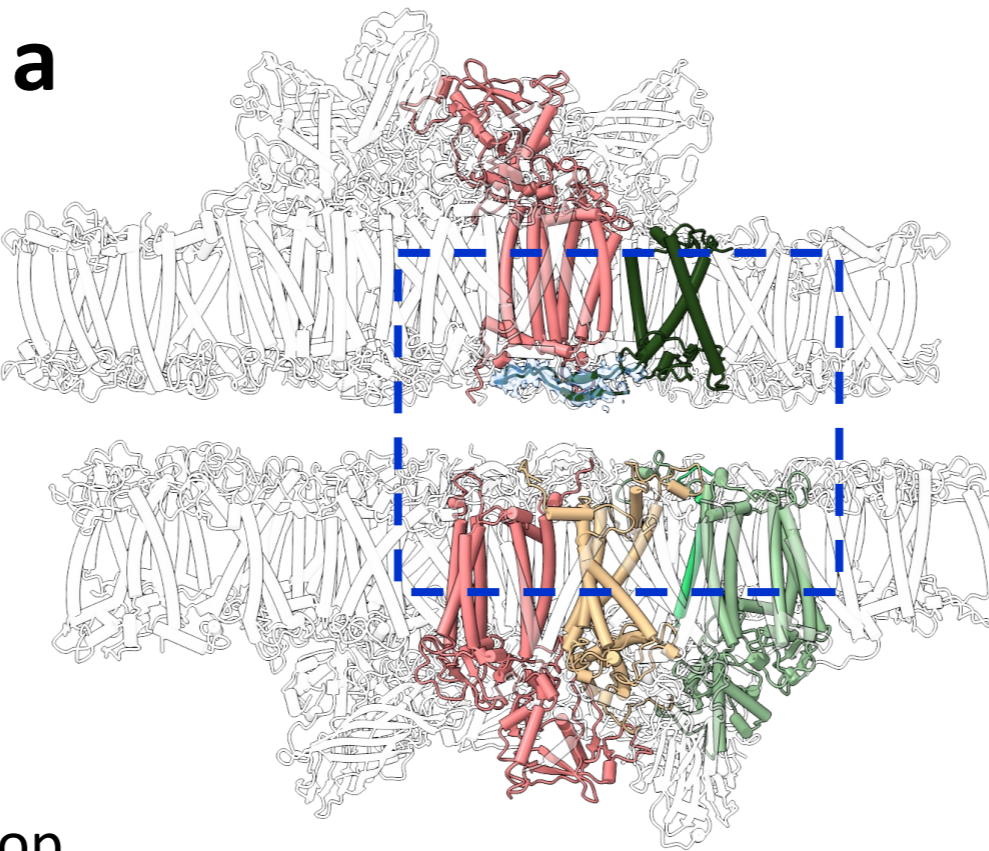

PSII compact top

PSII stretched top

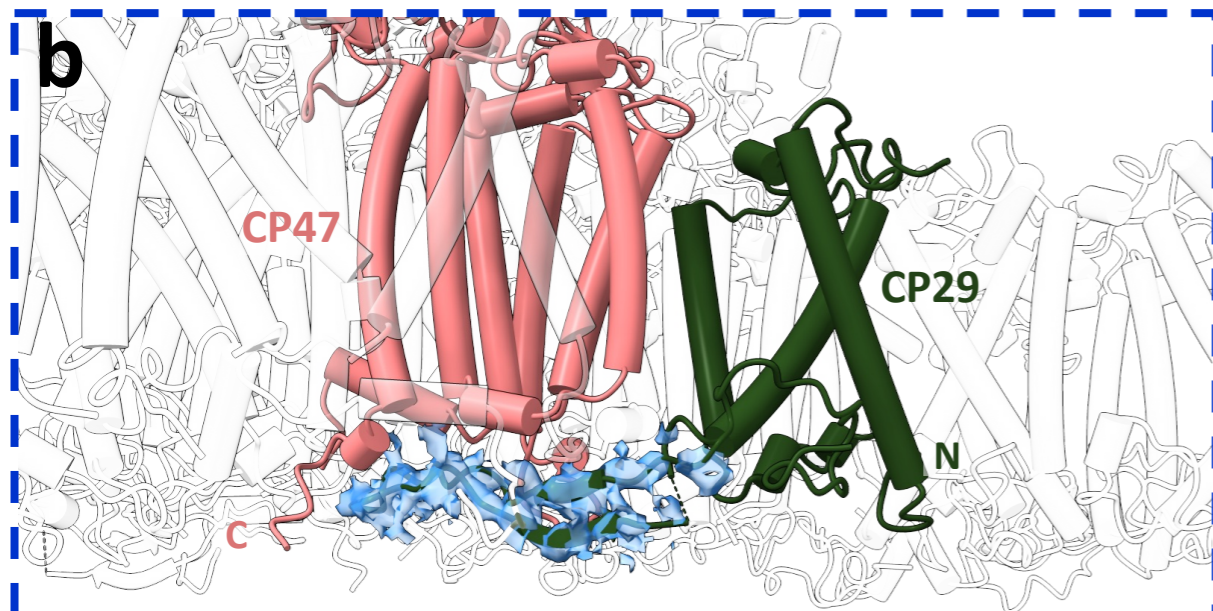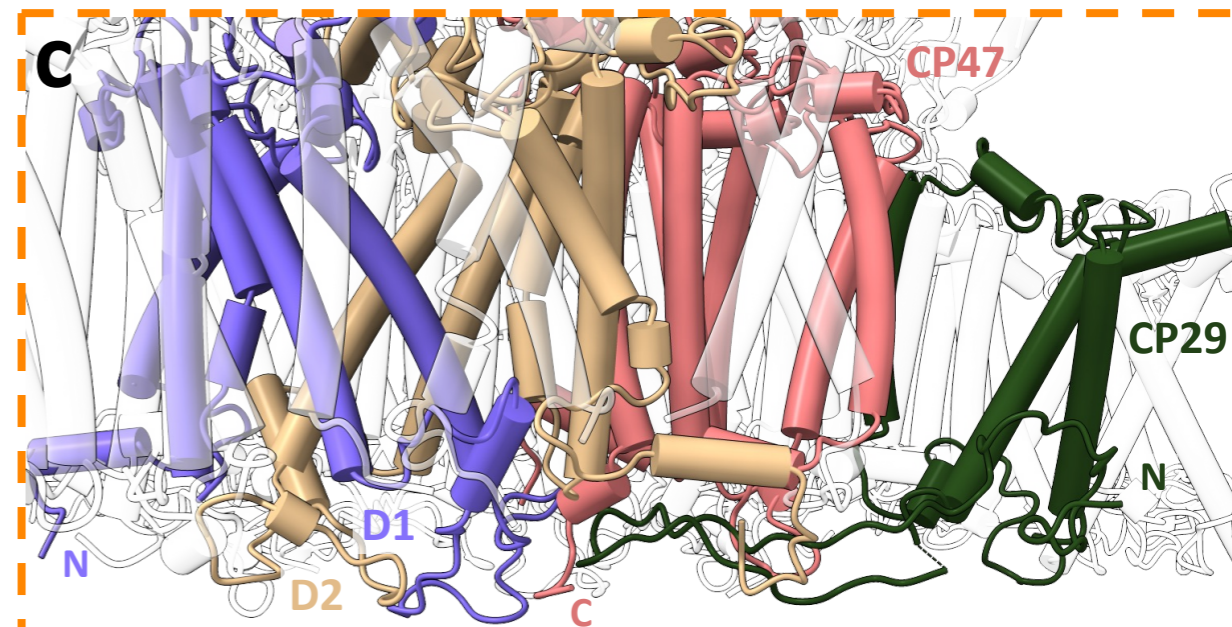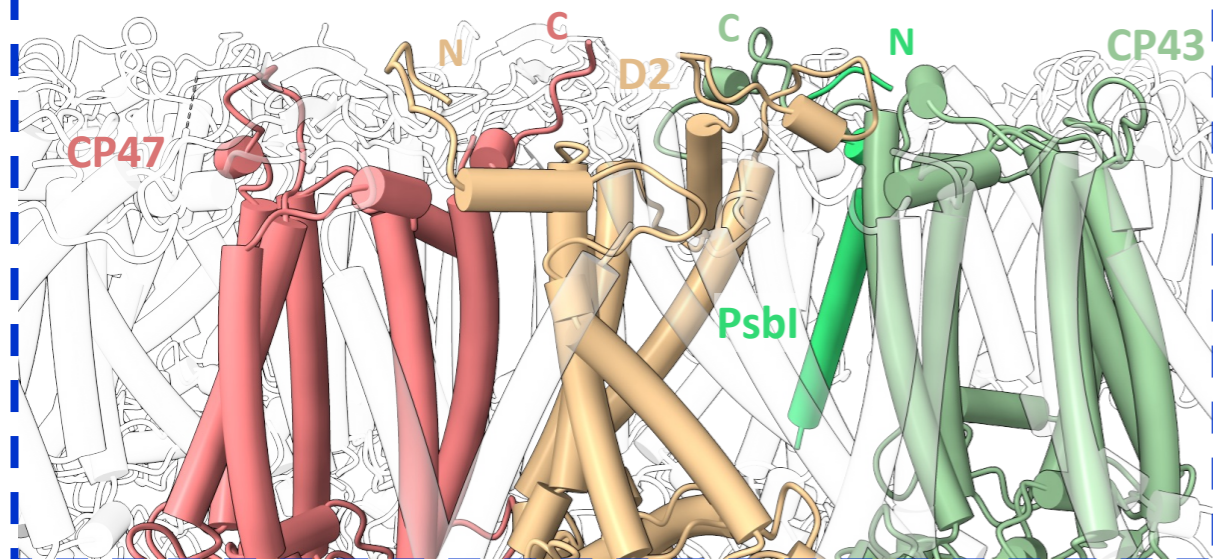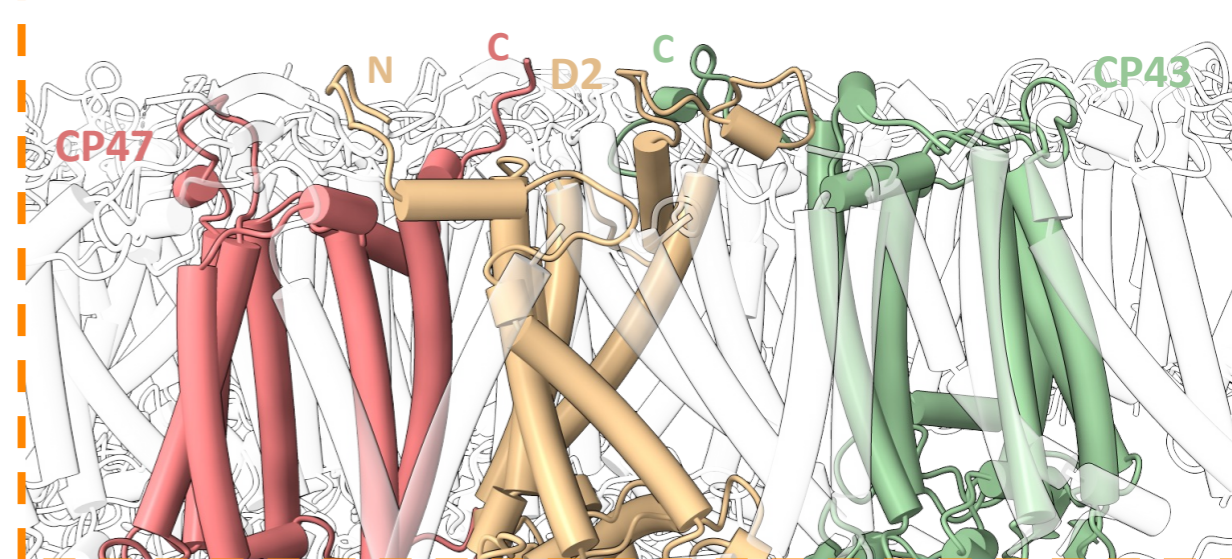

PSII compact bottom

PSII compact bottom

Supplement: supp [file elife-81150-supp-v1.zip]

**a****Stacked C2S2<sub>STR</sub>**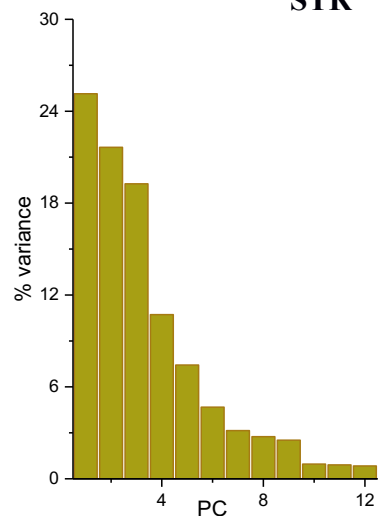**b**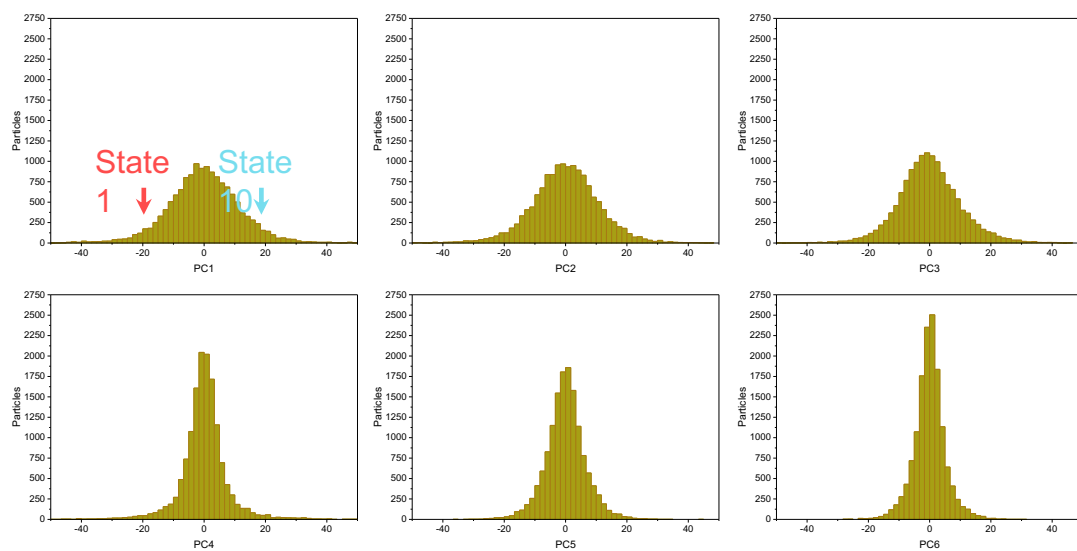**c****PC1**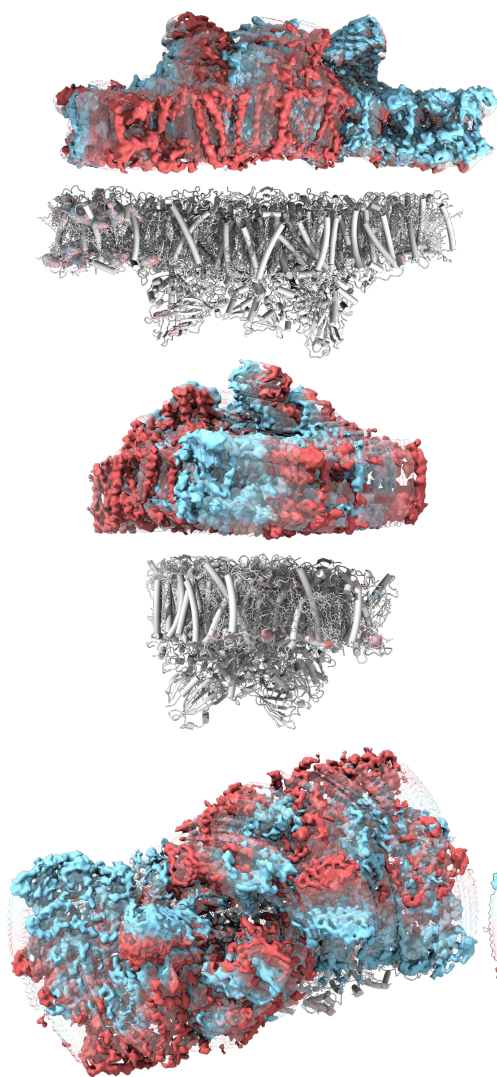**d****PC2**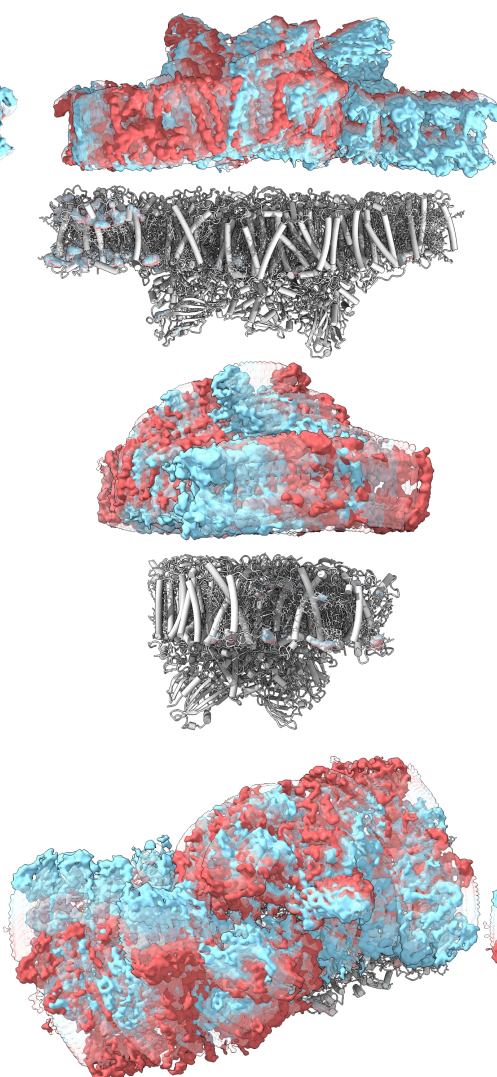**e****PC3**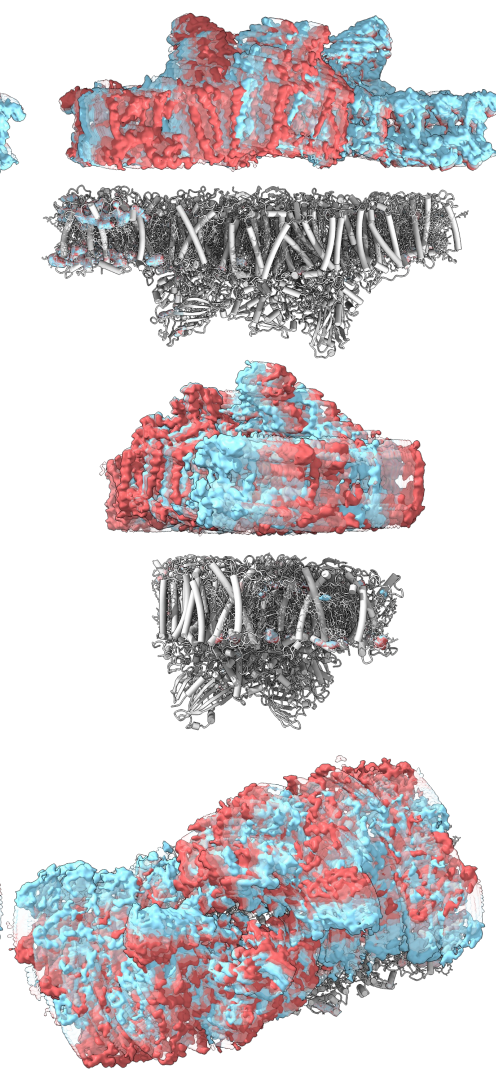

Supplement: supp [file elife-81150-supp-v1.zip]

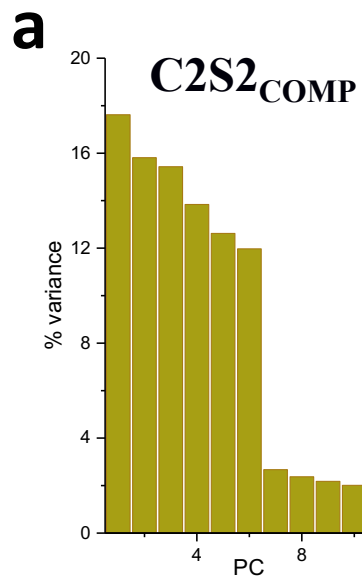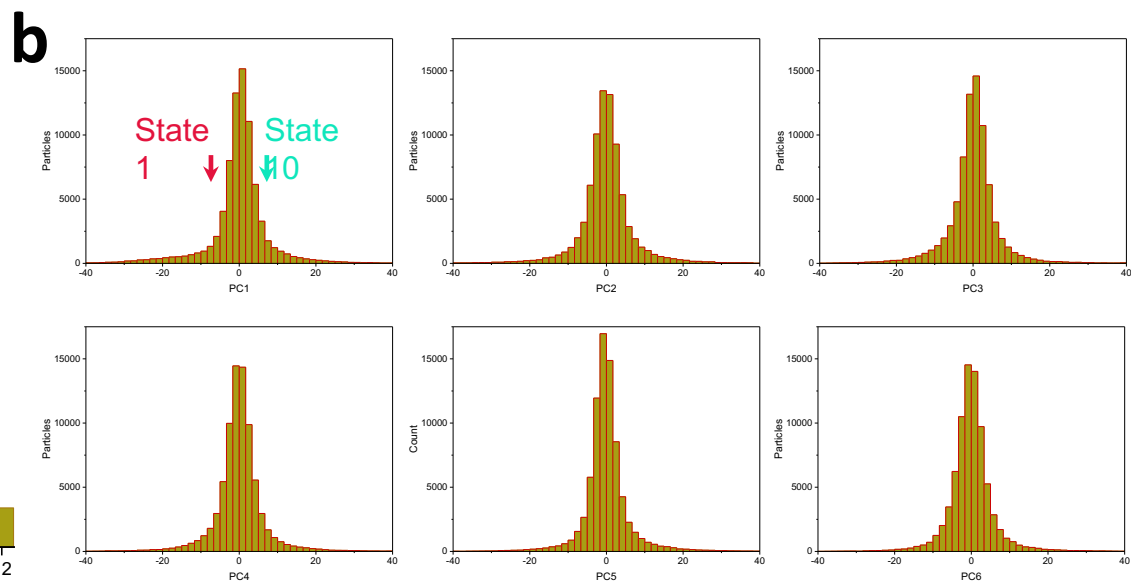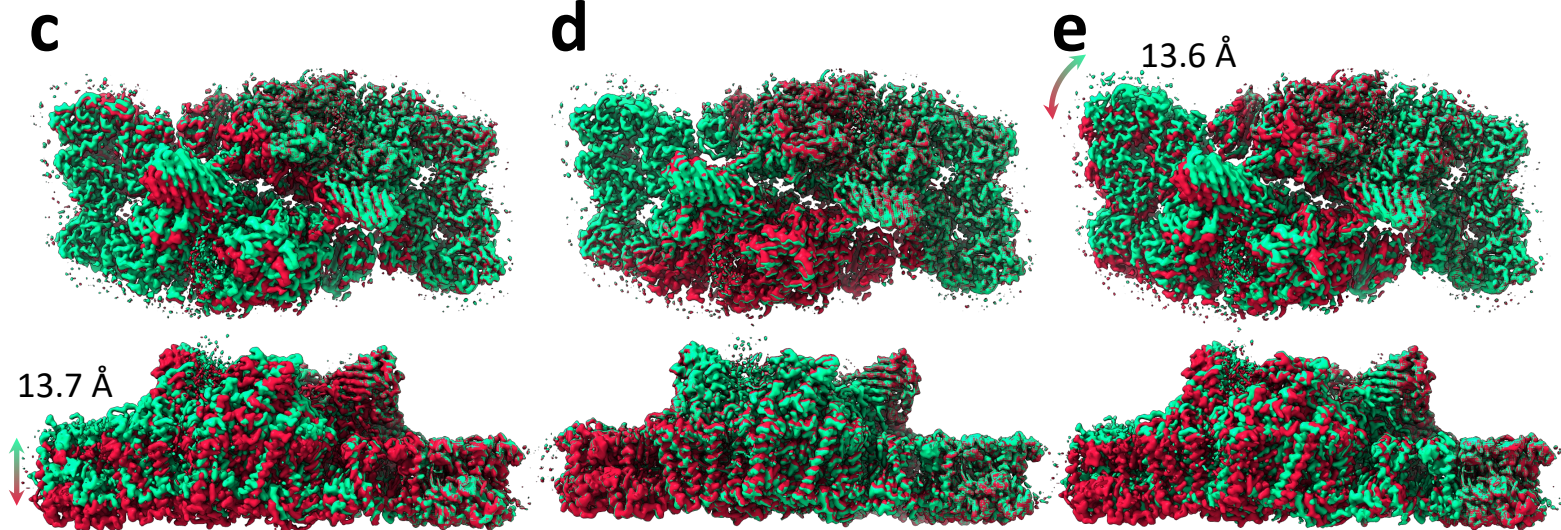

Supplement: supp [file elife-81150-supp-v1.zip]

**a****Compact**

State 10  
LHCII  
M3

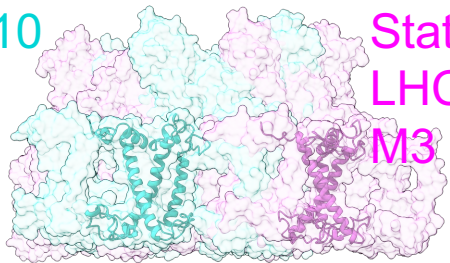

State 1  
LHCII  
M3

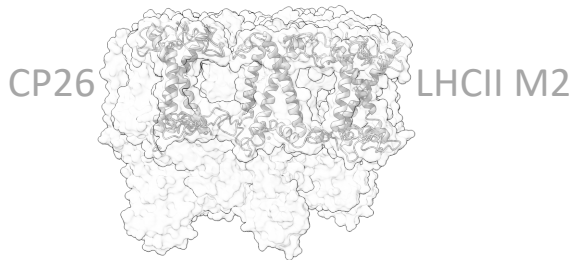**Compact****b****Stretched**

State 10  
LHCII M2

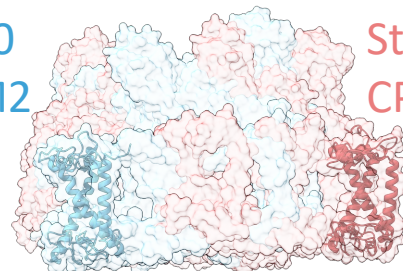

State 1  
CP26

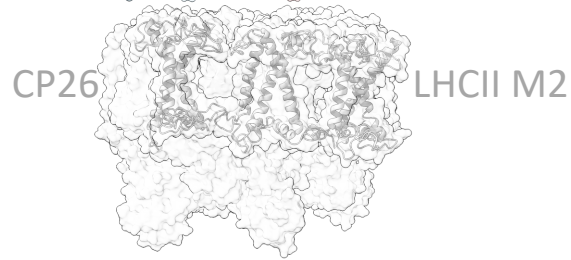**Compact**

Supplement: supp [file elife-81150-supp-v1.zip]

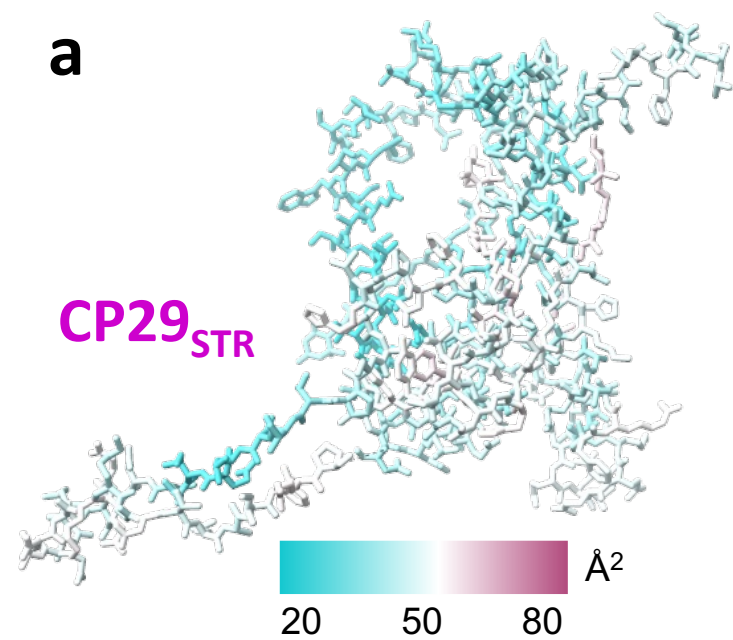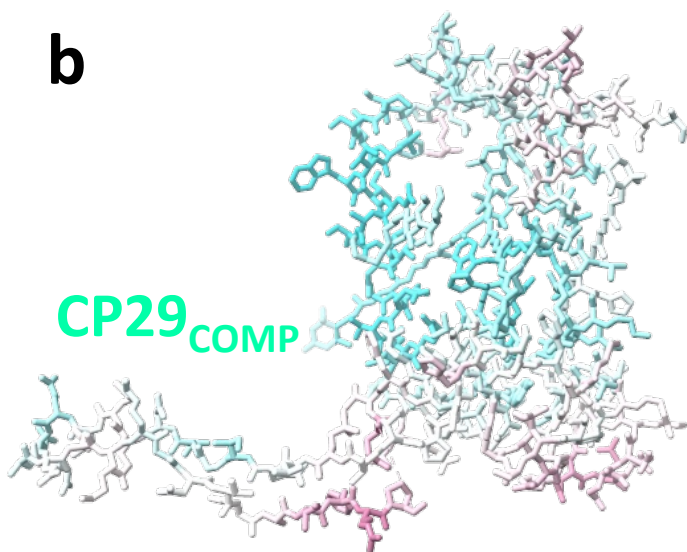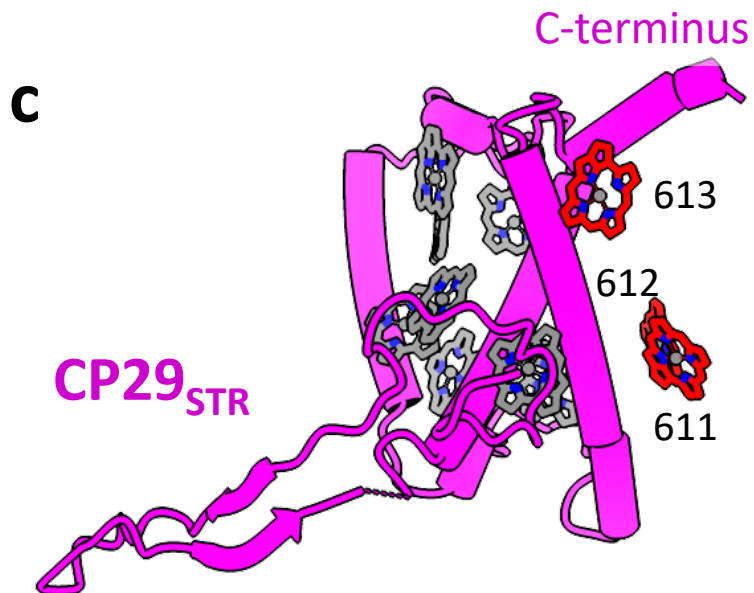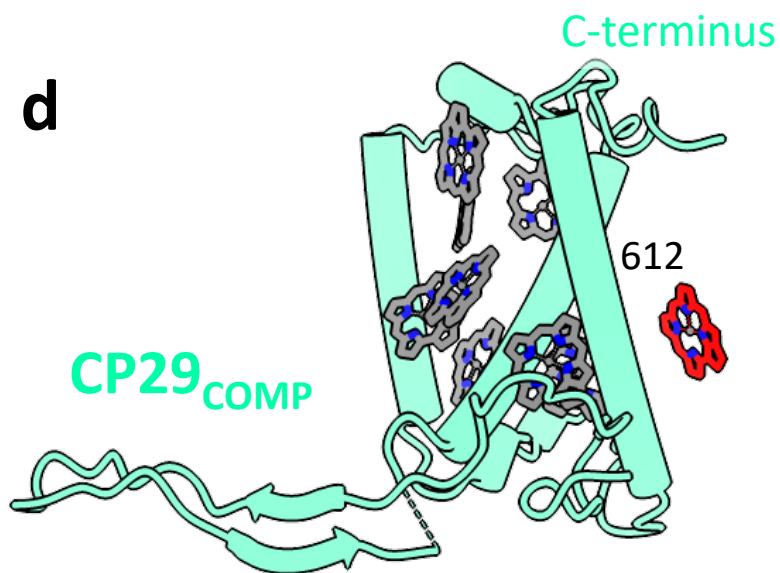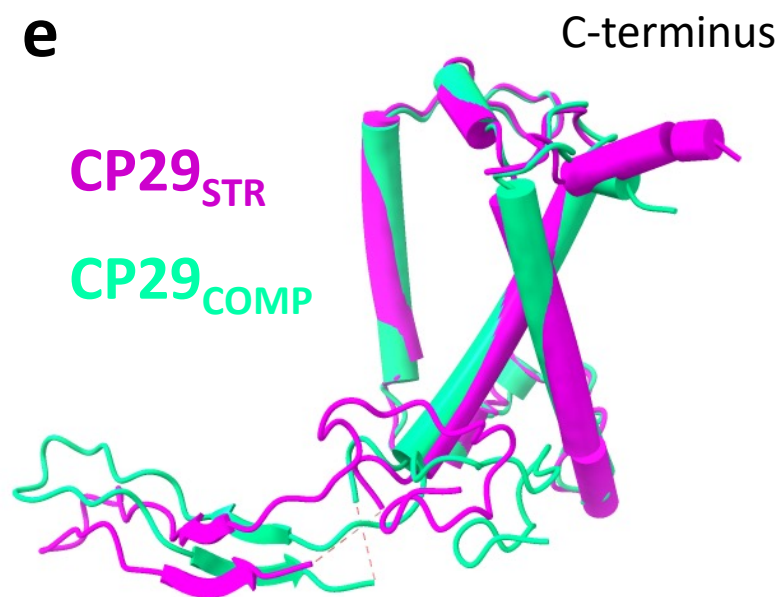

Supplement: supp [file elife-81150-supp-v1.zip]

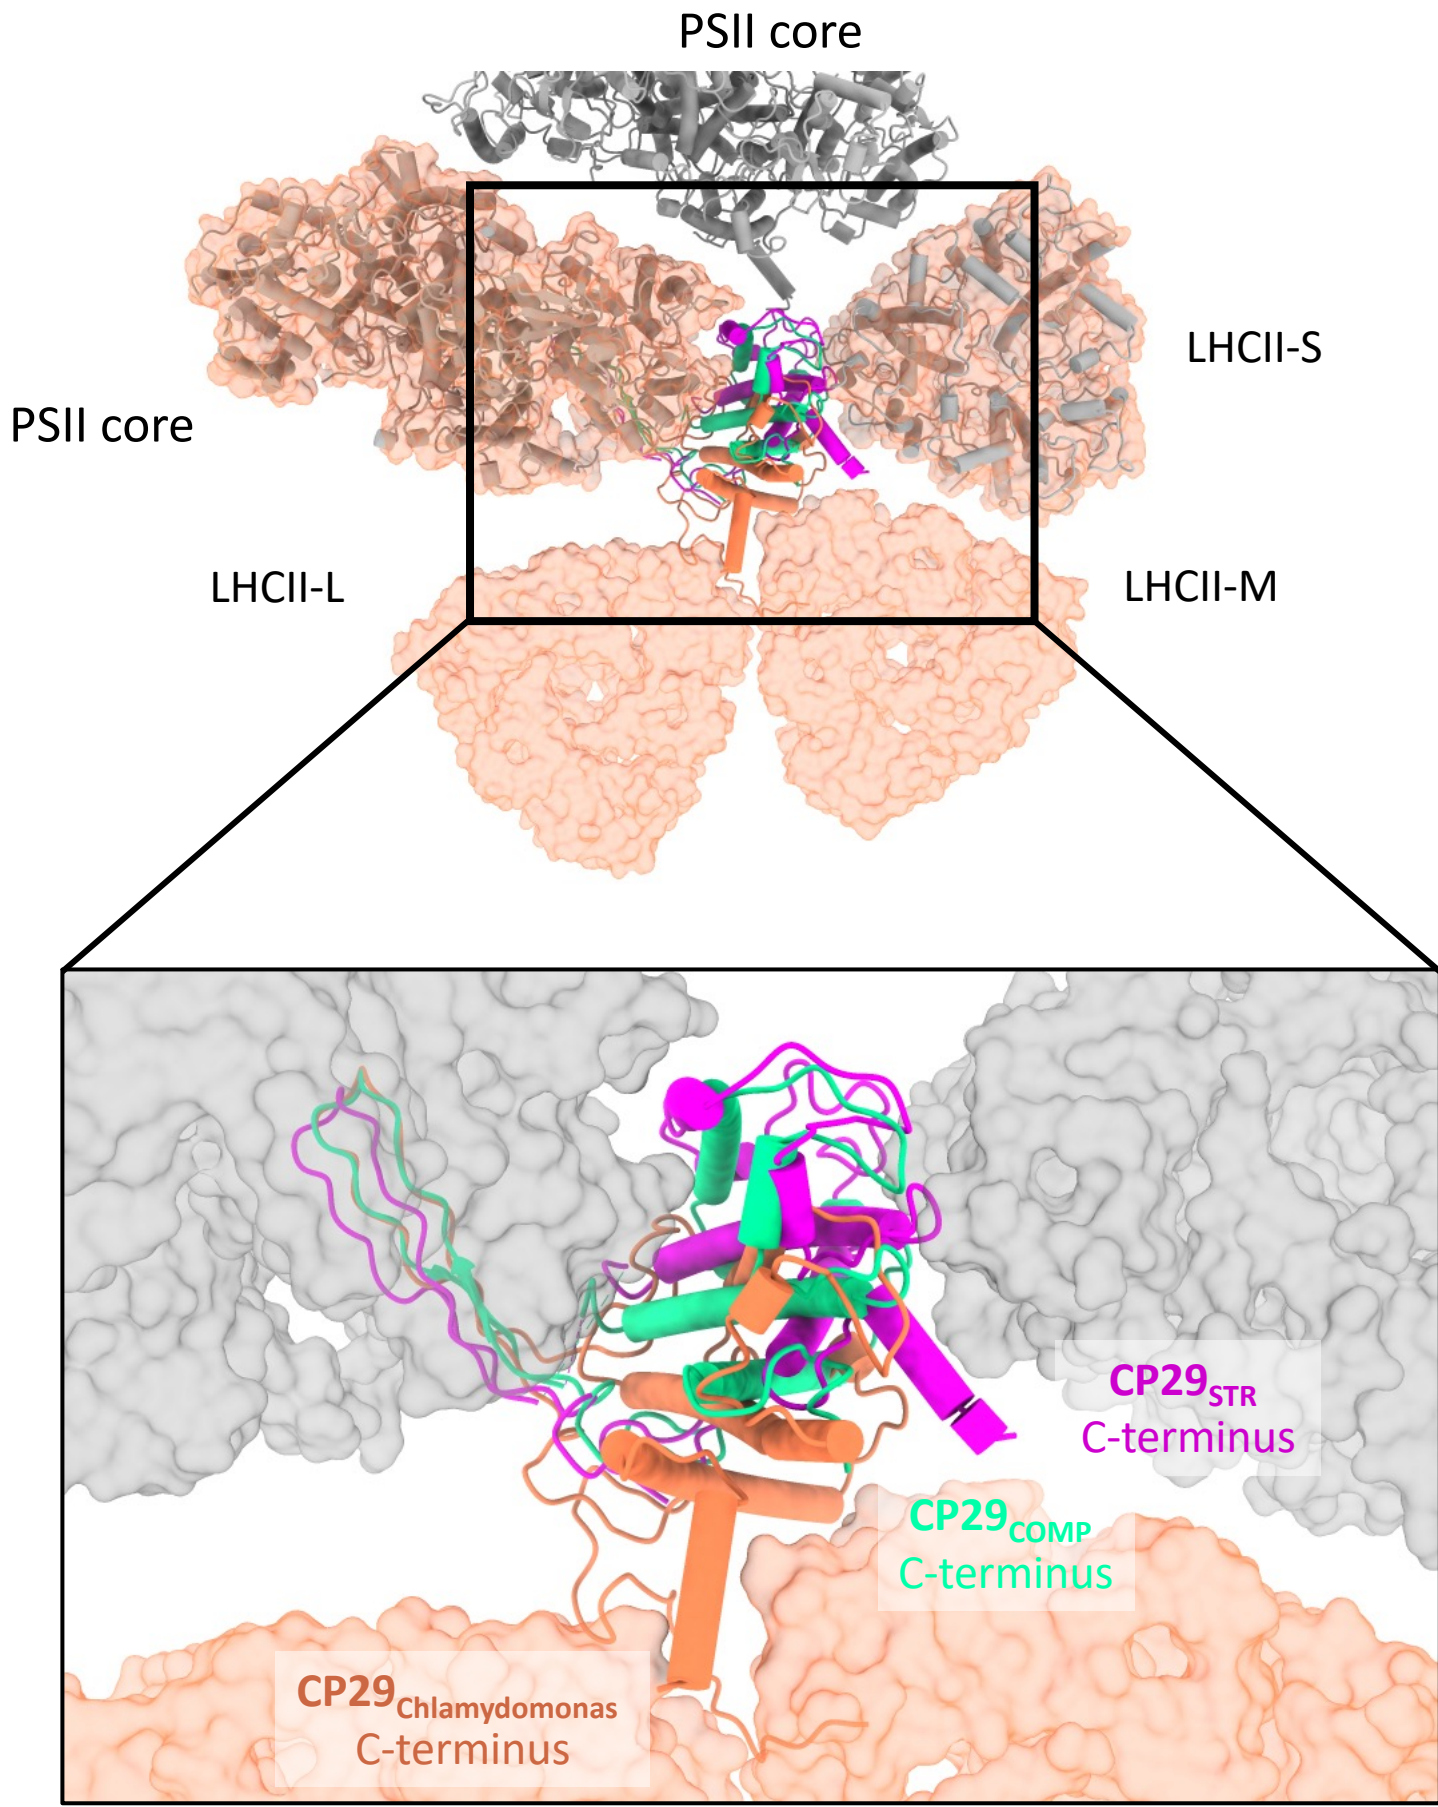

Supplement: supp [file elife-81150-supp-v1.zip]

**a**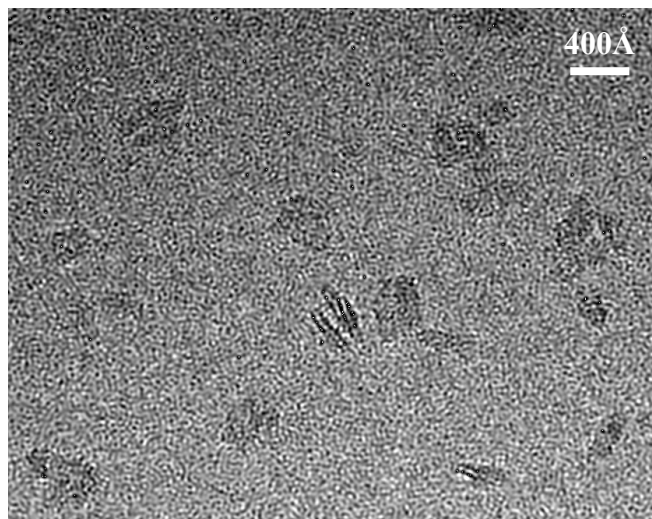**b**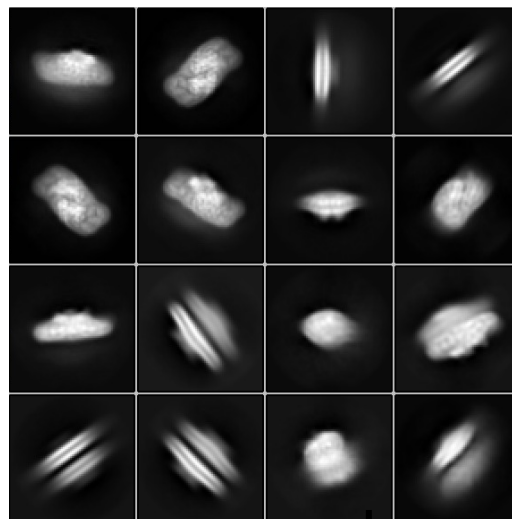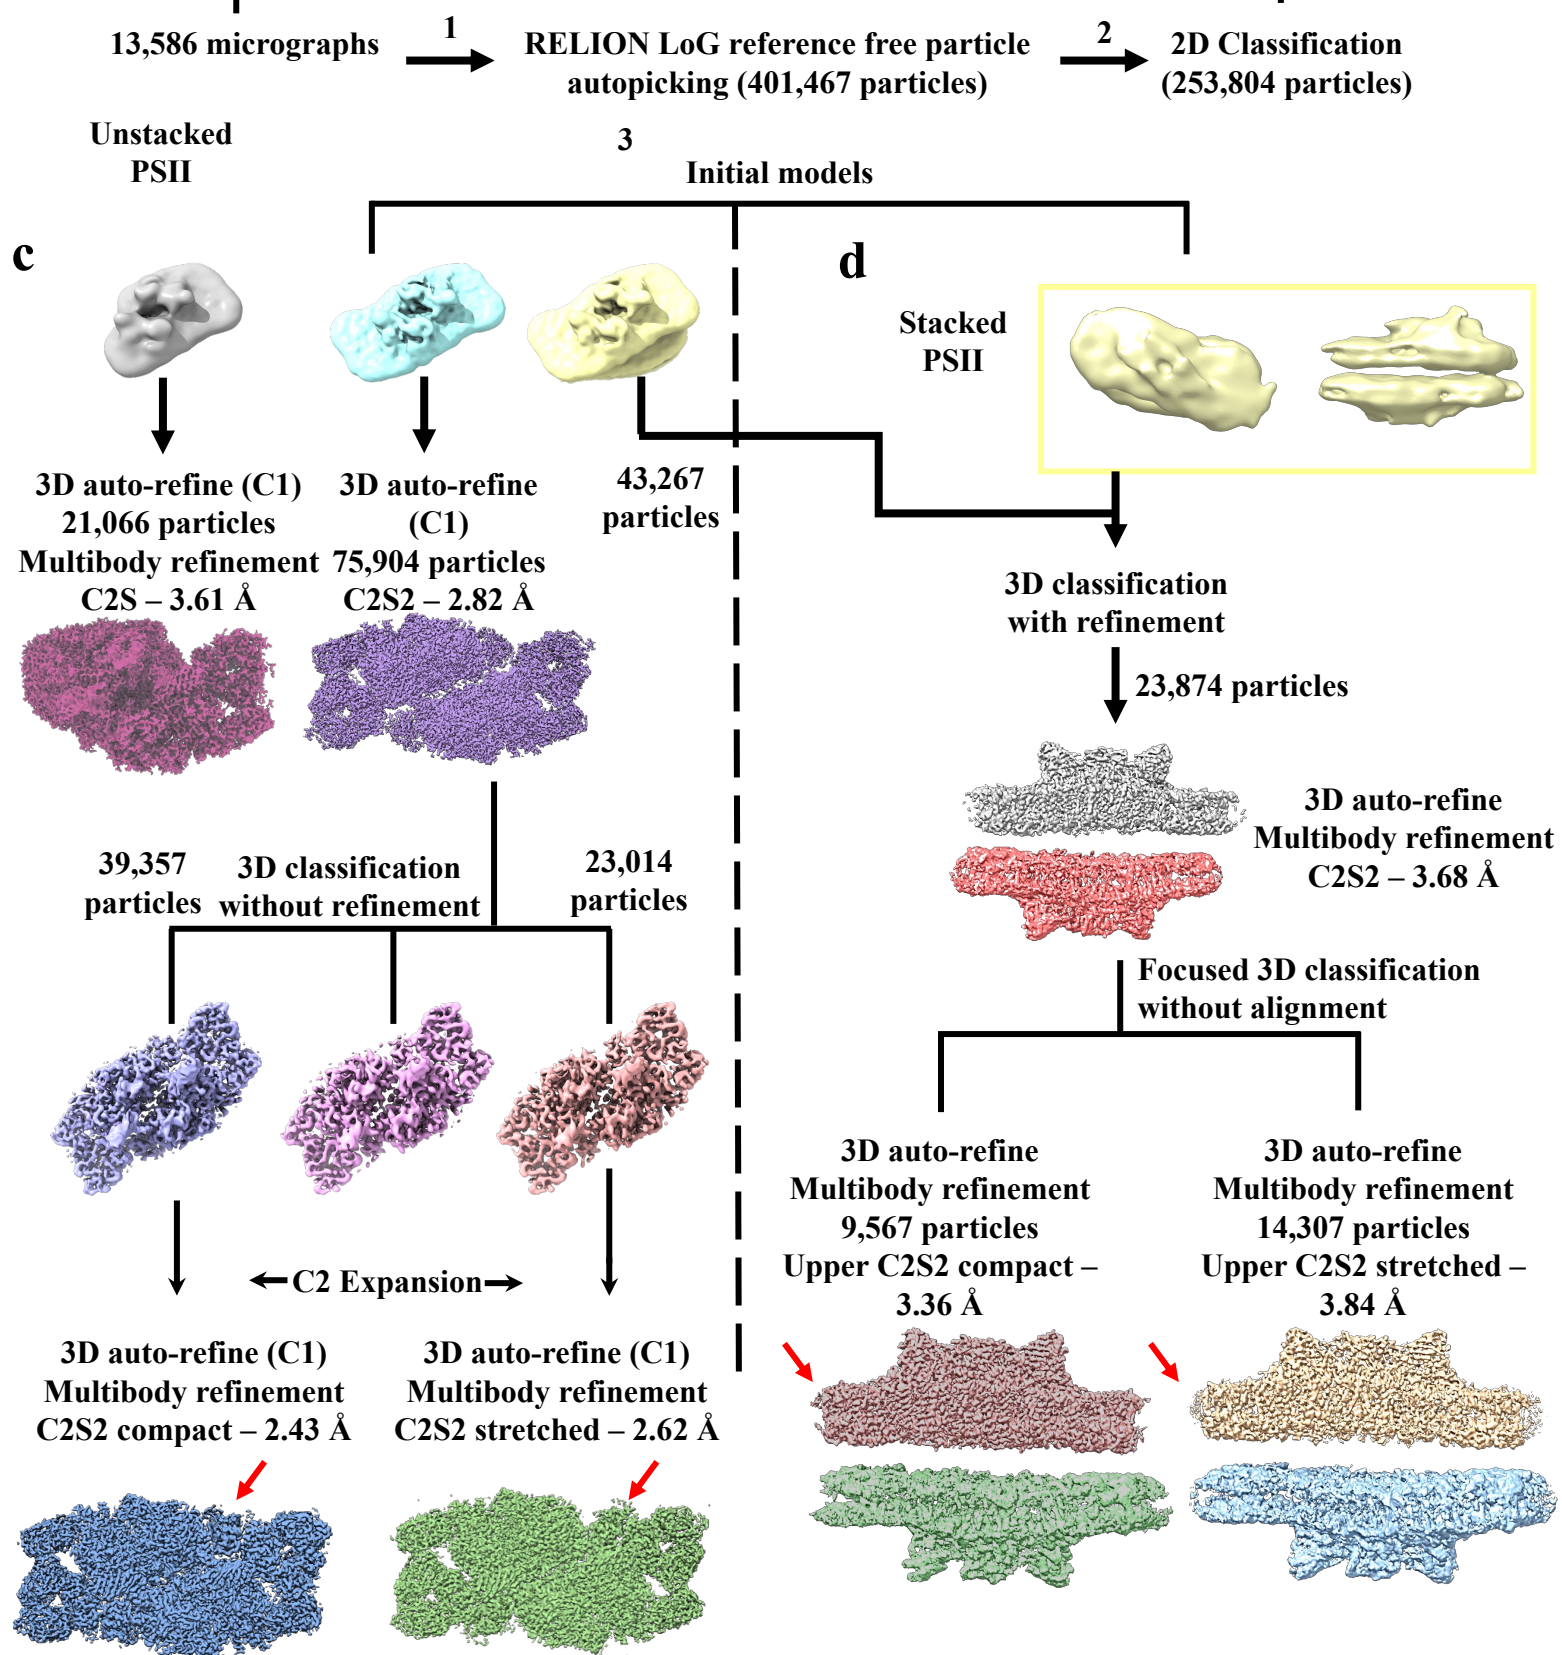

Supplement: supp [file elife-81150-supp-v1.zip]

**a**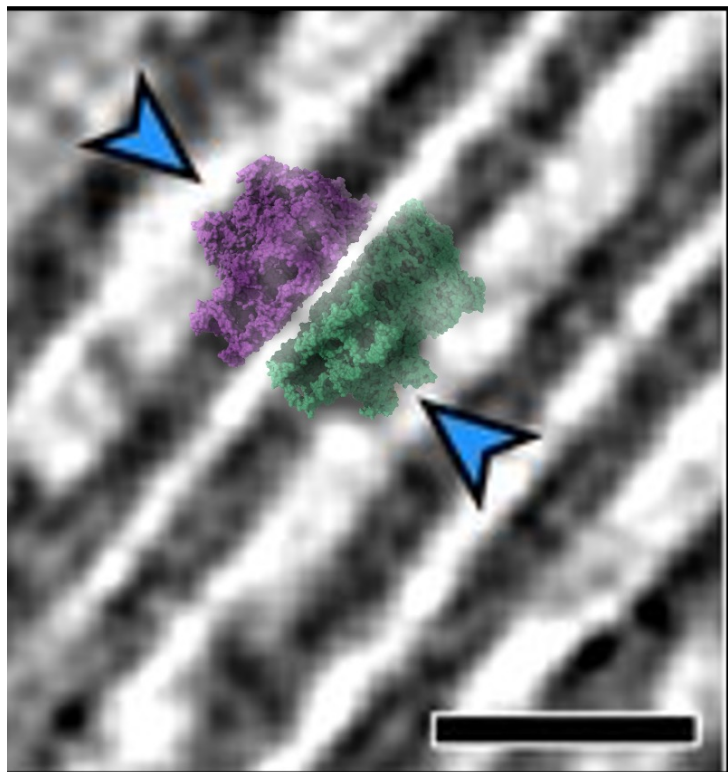**b**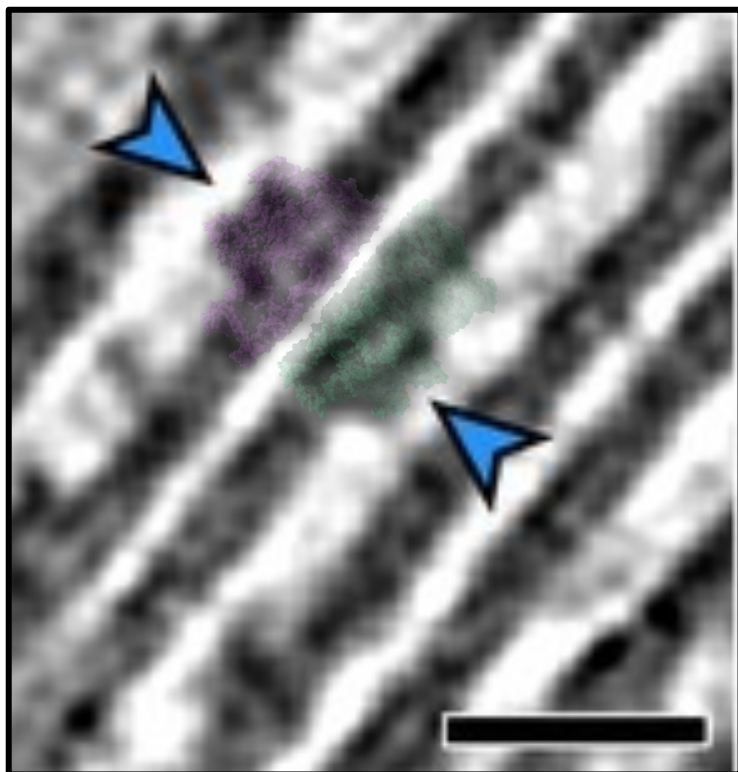**c**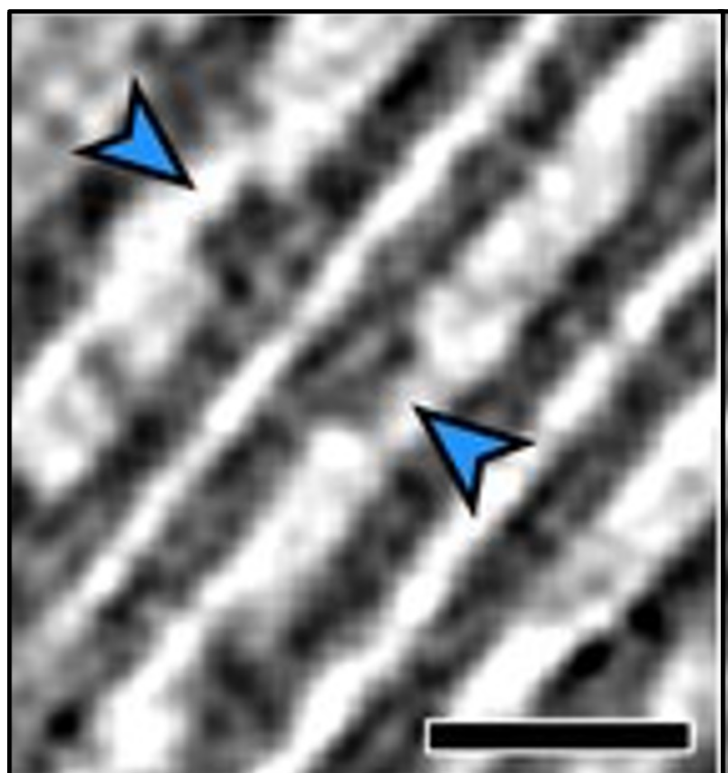

Supplement: supp [file elife-81150-supp-v1.zip]

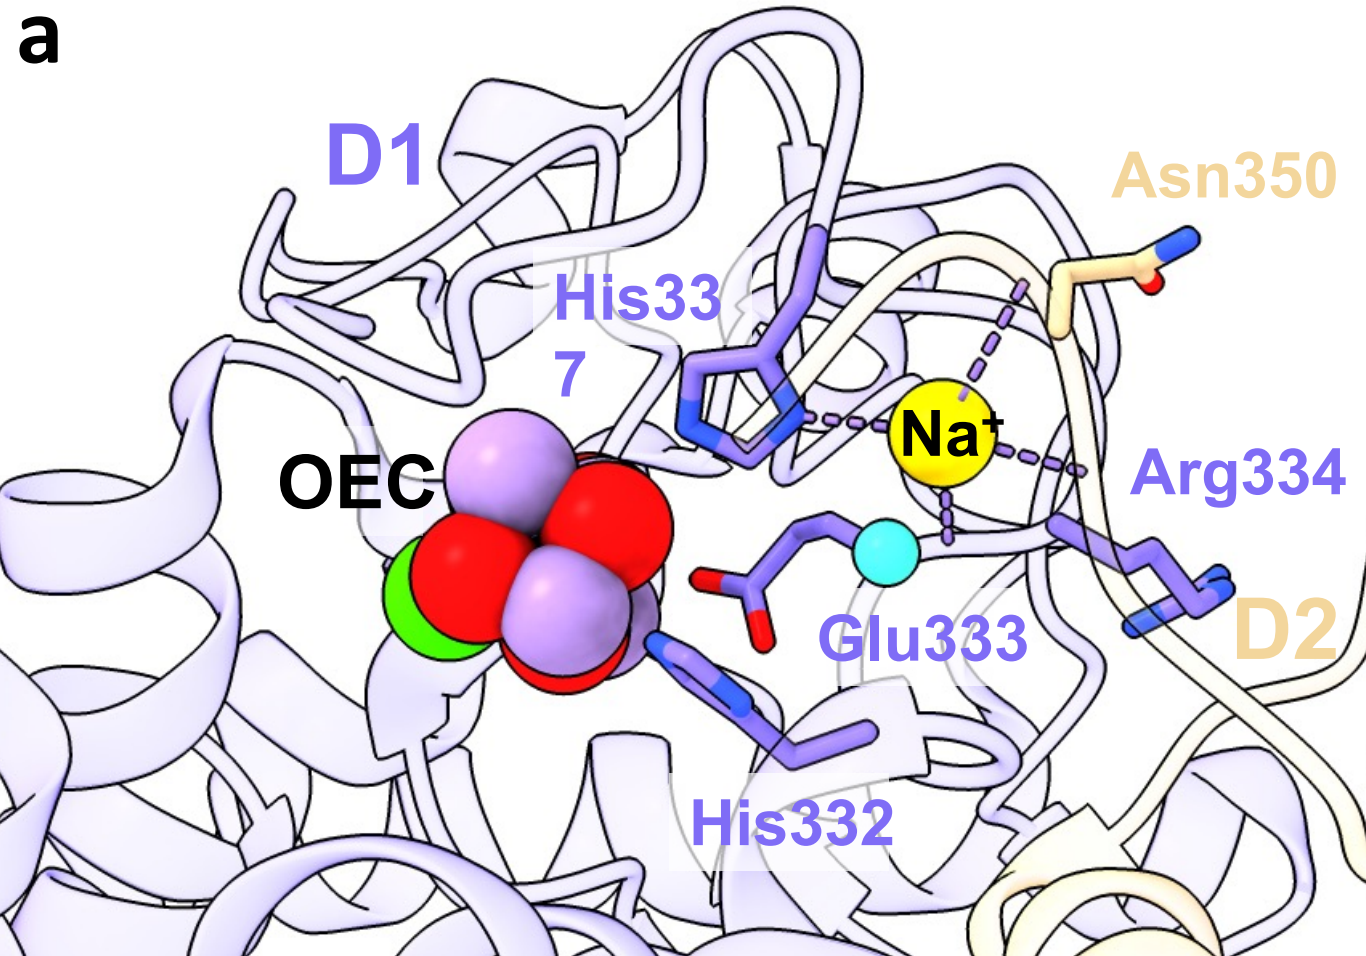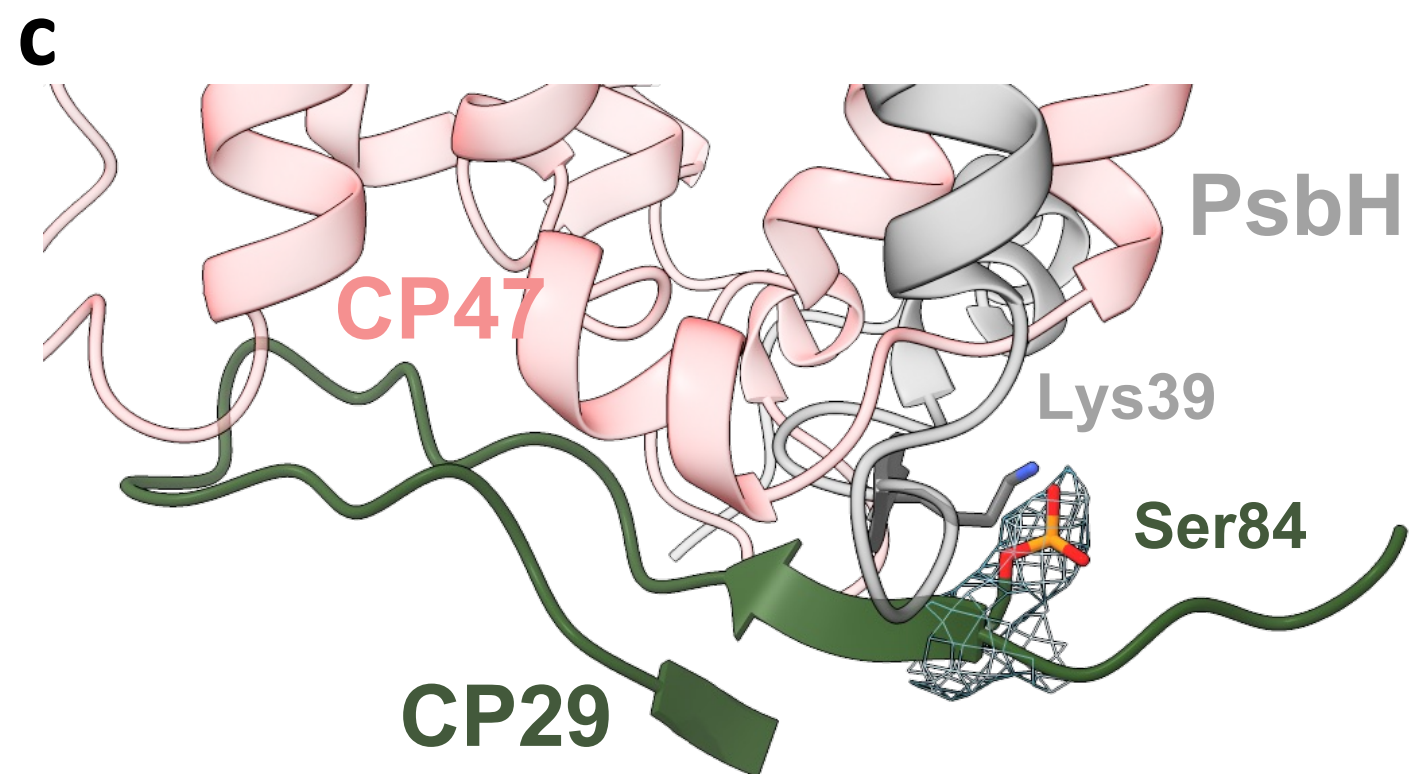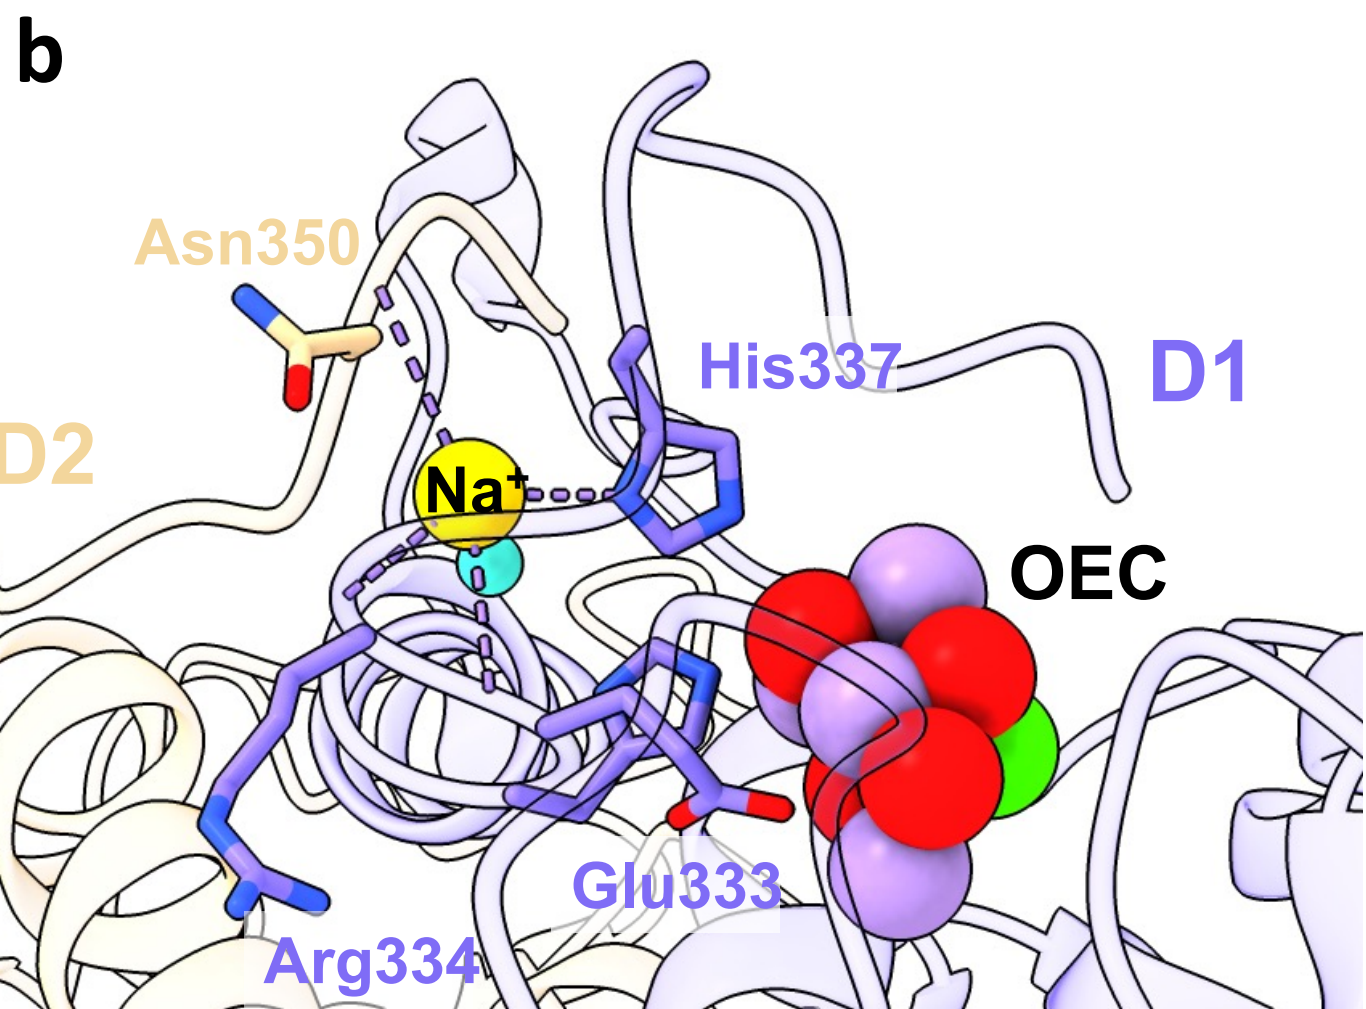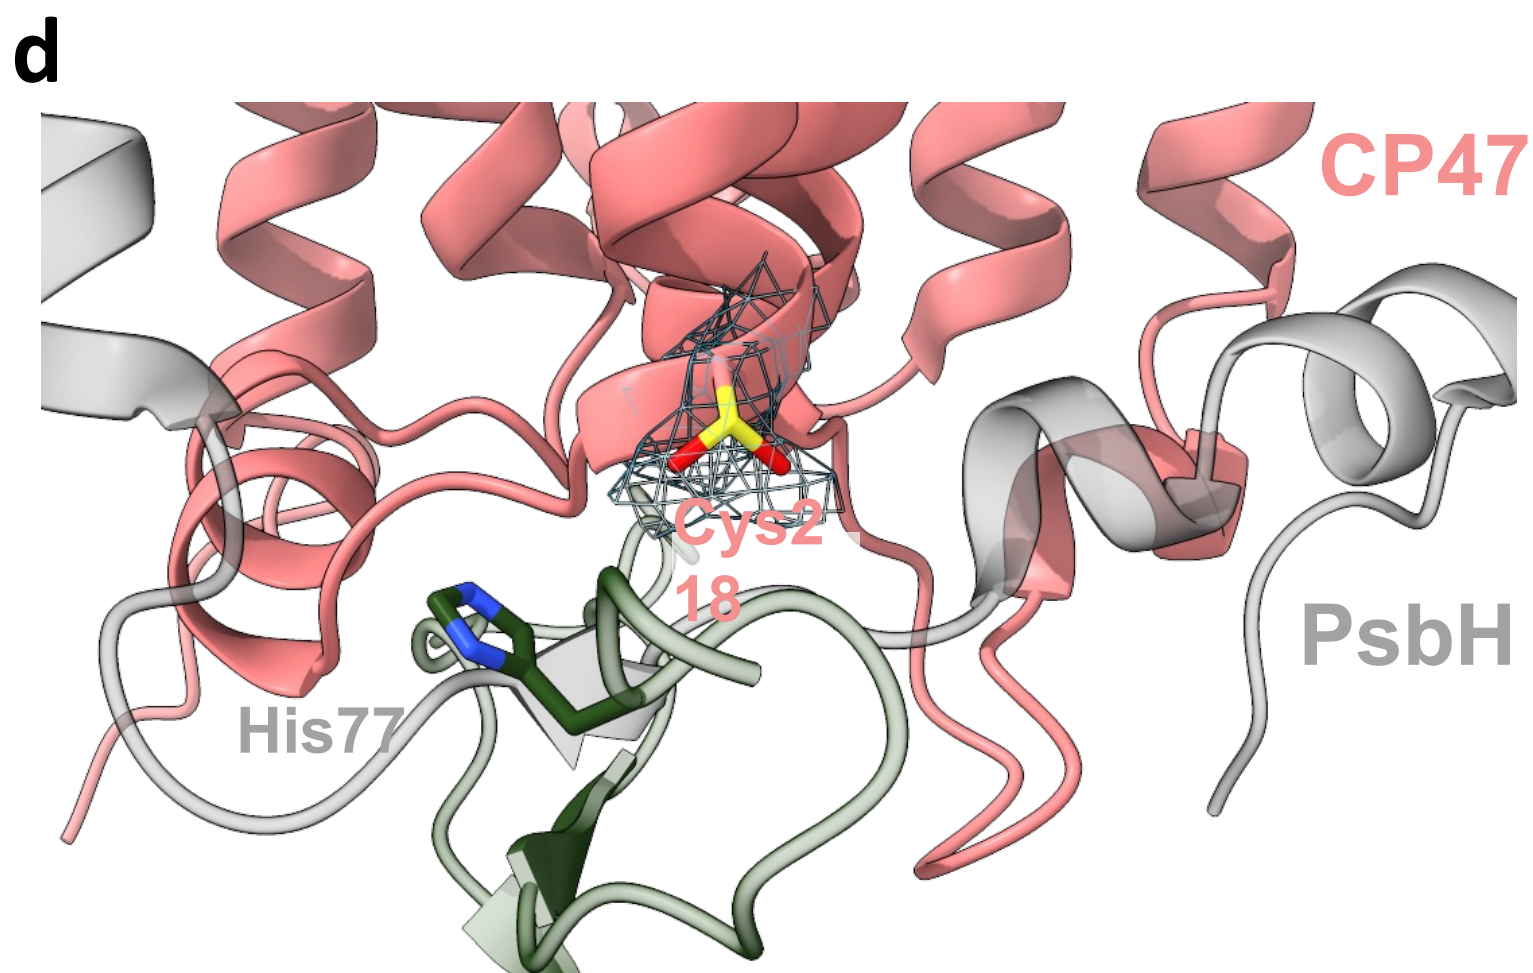

Supplement: supp [file elife-81150-supp-v1.zip]

**a**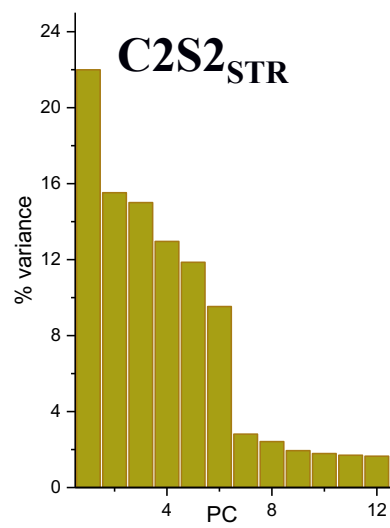**b**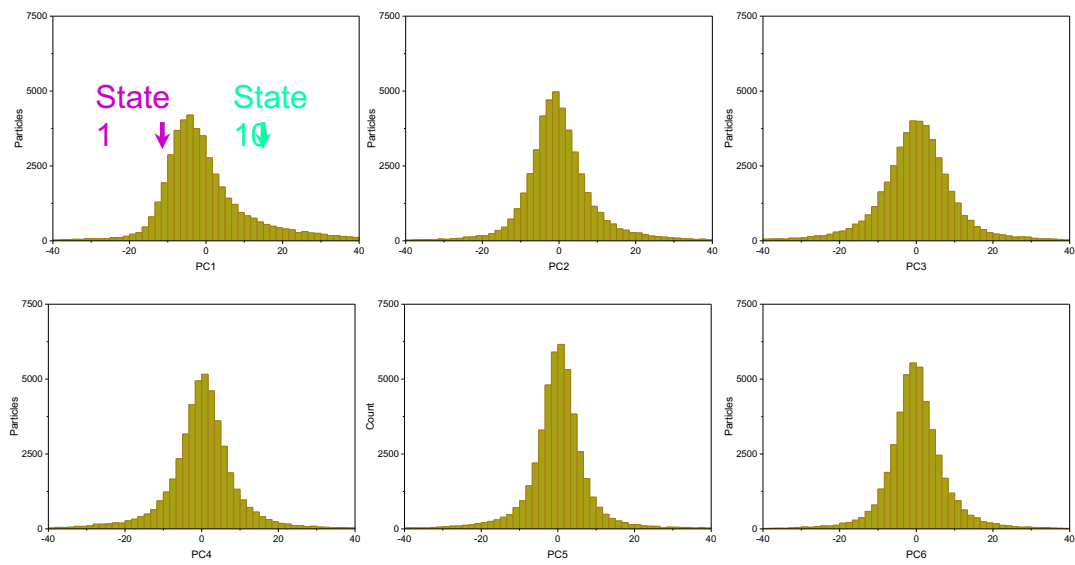**c**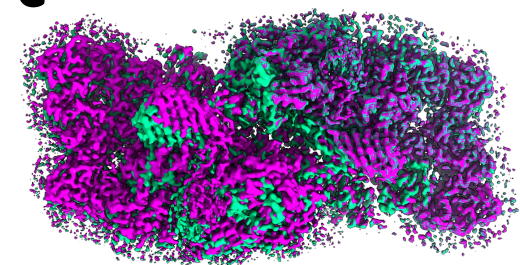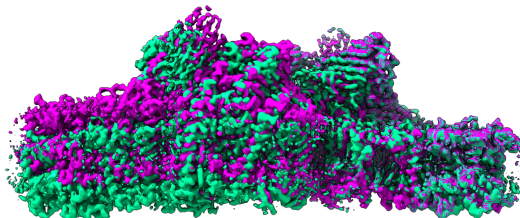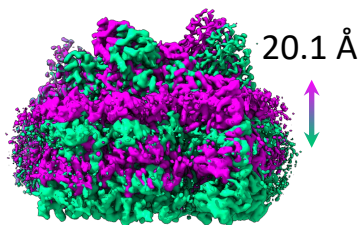**d**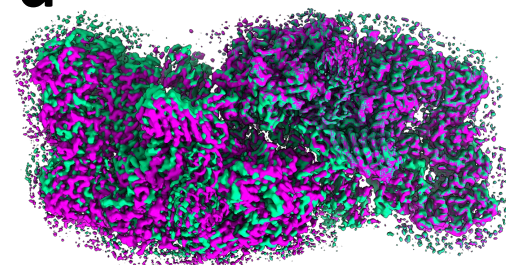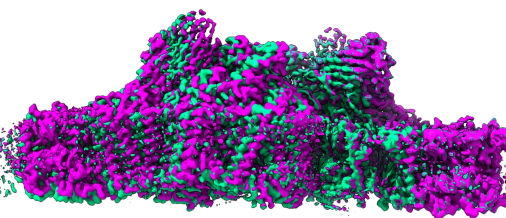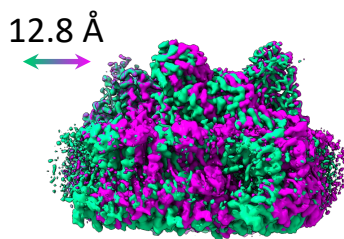**e**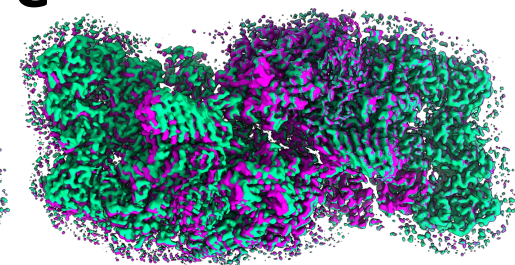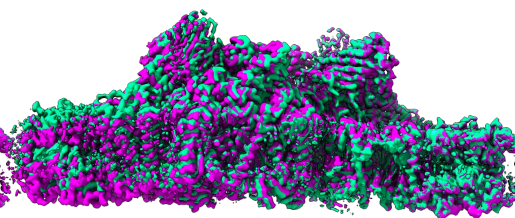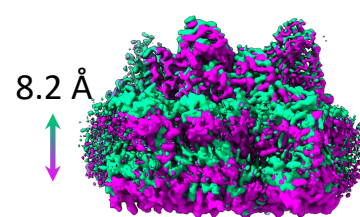

Supplement: supp [file elife-81150-supp-v1.zip › elife_poa_e81150_Figure_1_figure_supplement_7.pdf]

# C2S2<sub>STR</sub>

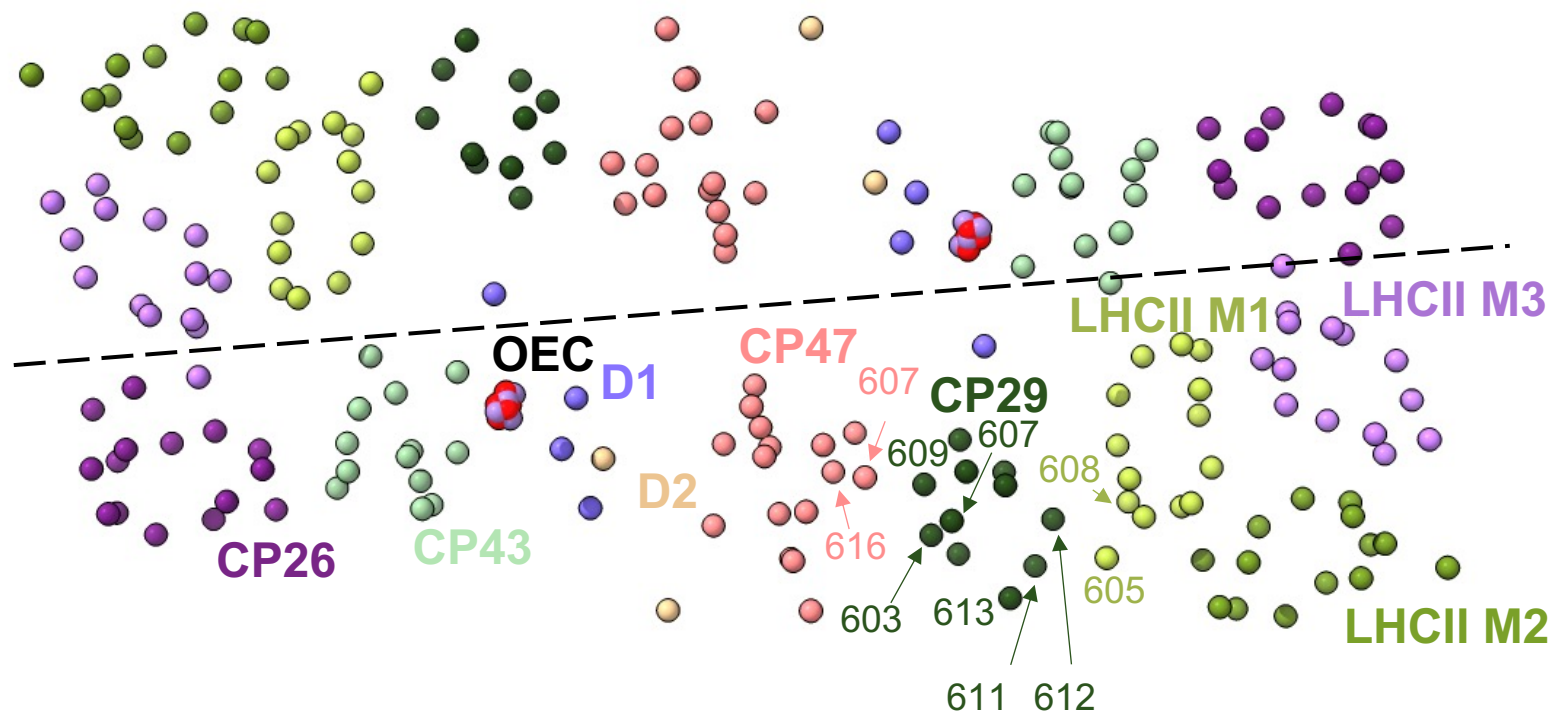

# C2S2<sub>COMP</sub>

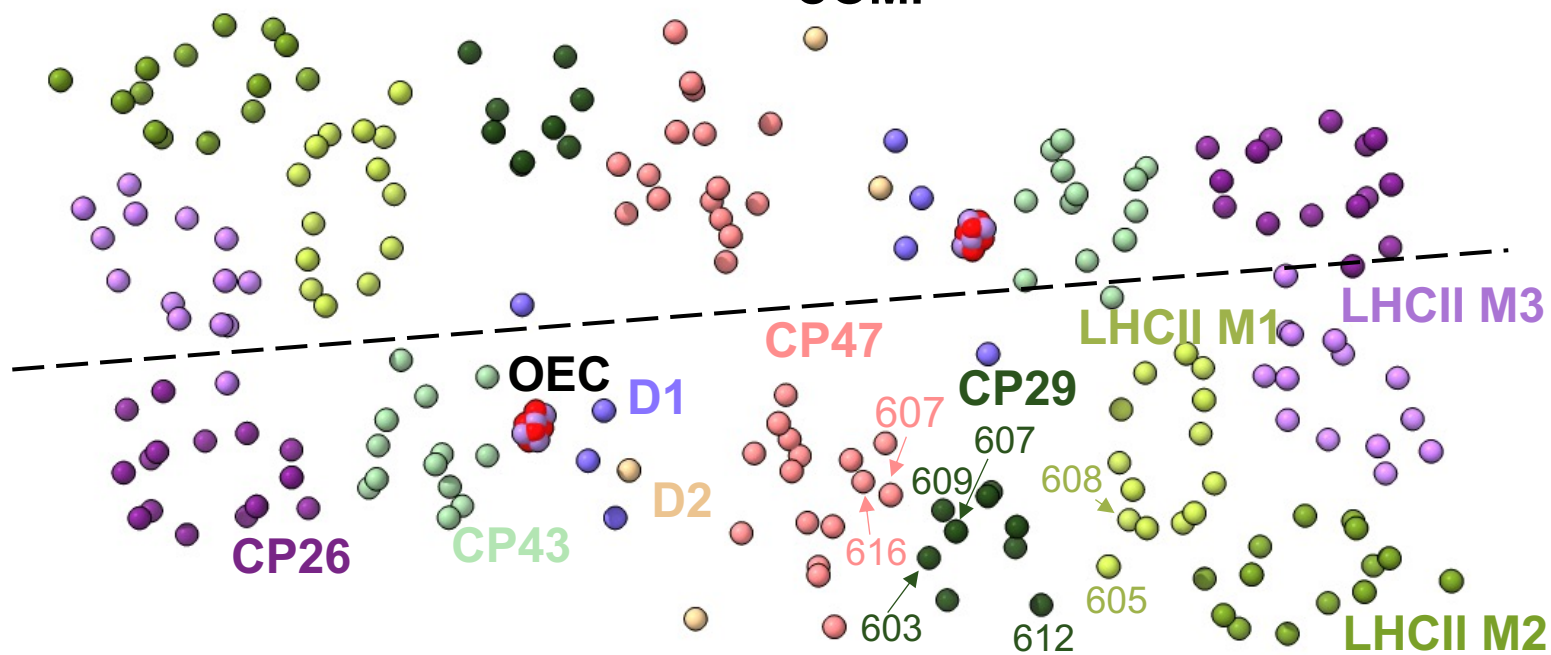

Supplement: supp [file elife-81150-supp-v1.zip › elife_poa_e81150_Figure_1_figure_supplement_8.pdf]

**a****Stacked C2S2<sub>COMP</sub>**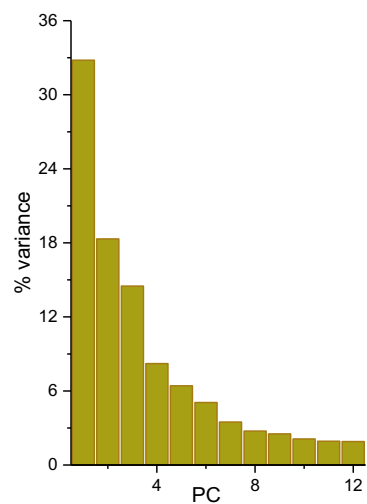**b**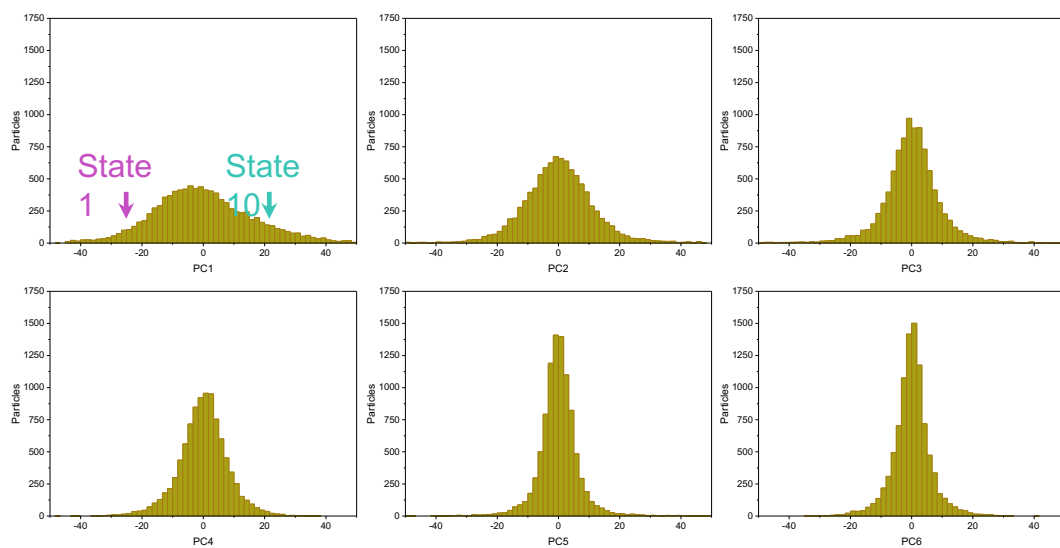**c****PC1**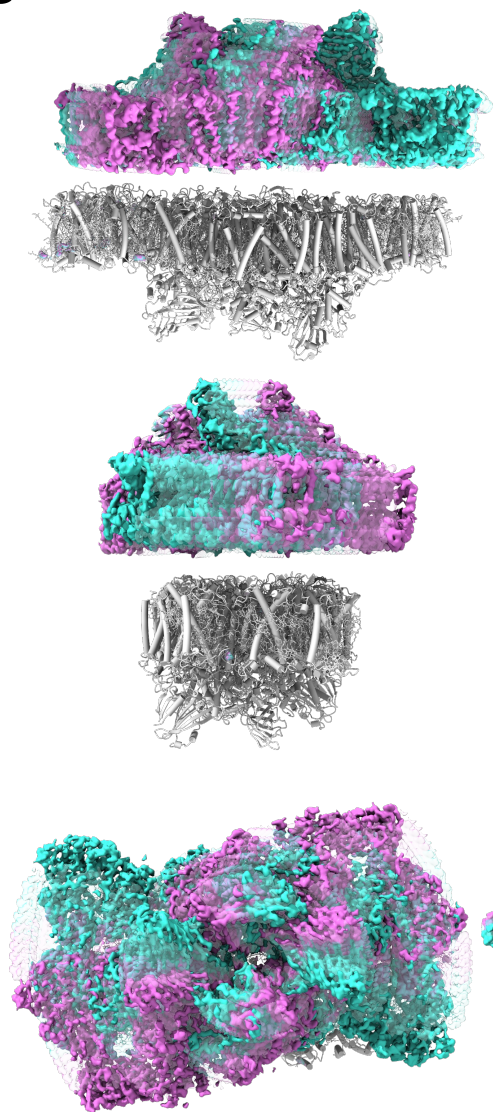**d****PC2**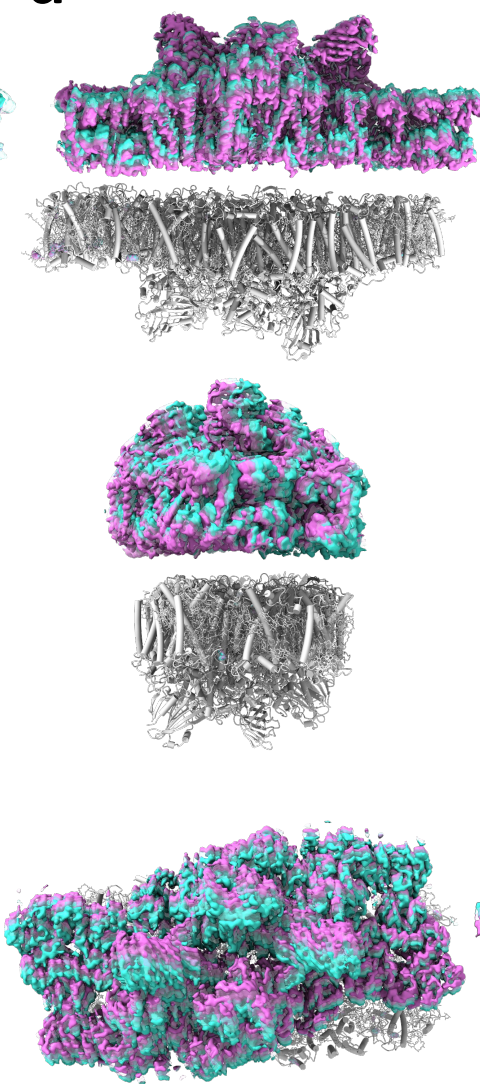**e****PC3**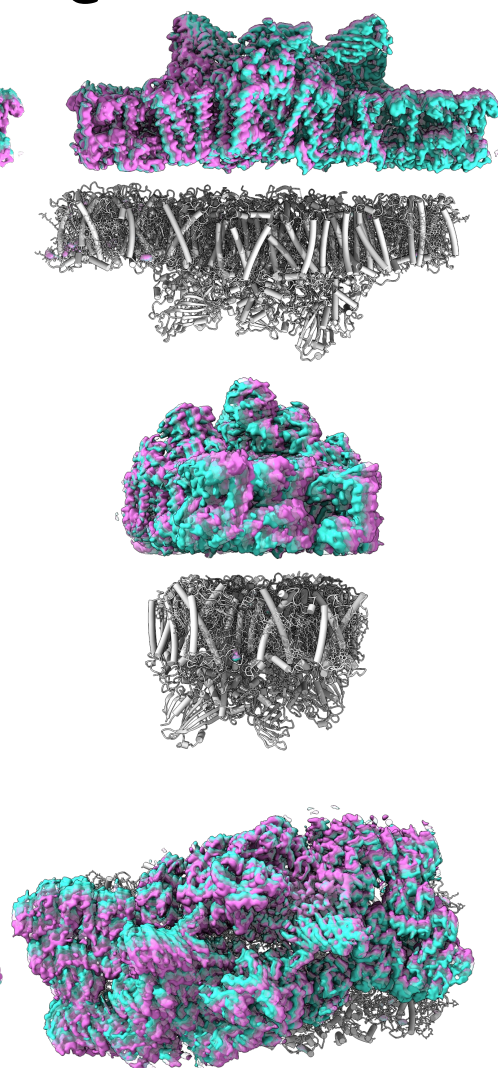

Supplement: supp [file elife-81150-supp-v1.zip › elife_poa_e81150_Figure_4_figure_supplement_1.pdf]
